# Supplementary material
Source: publisher site journal article supplement (https://www.dovepress.com/article/398666)
Supplement: Supplementary file 1 [file get_supplementary_file.php]

**Appendix 1** **Search strategy**

|  |  | **PUBMED** | **Total** |
| --- | --- | --- | --- |
| **Search time** |  | 2021/12/17 |  |
| **Population** | #1 | "Liver Neoplasms"[Mesh] OR "Gallbladder Neoplasms"[Mesh] OR "Cholangiocarcinoma"[Mesh] OR "Pancreatic Neoplasms"[Mesh] | 271467 |
| #2 | "Liver Neoplasm"[Title/Abstract] OR "hepatic neoplasm*"[Title/Abstract] OR "Cancer of Liver"[Title/Abstract] OR "Hepatocellular Cancer"[Title/Abstract] OR "Hepatic Cancer"[Title/Abstract] OR "liver cancer*"[Title/Abstract] OR "Hepatocellular Carcinoma"[Title/Abstract] OR "Cancer of the Liver"[Title/Abstract] OR "primary hepatic carcinoma"[Title/Abstract] OR "primary liver cancer"[Title/Abstract] OR "HCC"[Title/Abstract] OR "PHC"[Title/Abstract] OR "Biliary Tract Neoplasm"[Title/Abstract] OR "Cancer of the Biliary Tract"[Title/Abstract] OR "Cancer of Biliary Tract"[Title/Abstract] OR "biliary tract cancer*"[Title/Abstract] OR "gallbladder neoplasm*"[Title/Abstract] OR "Cancer of Gallbladder"[Title/Abstract] OR "gallbladder cancer*"[Title/Abstract] OR "Gall Bladder Cancer"[Title/Abstract] OR "Cancer of the Gallbladder"[Title/Abstract] OR "Cholangiocarcinomas"[Title/Abstract] OR "cholangiocellular carcinoma*"[Title/Abstract] OR "Extrahepatic Cholangiocarcinoma"[Title/Abstract] OR "Intrahepatic Cholangiocarcinoma"[Title/Abstract] OR "pancreatic neoplasm*"[Title/Abstract] OR "Cancer of Pancreas"[Title/Abstract] OR "Pancreas Cancer*"[Title/Abstract] OR "Pancreatic Cancer"[Title/Abstract] OR "Cancer of the Pancreas"[Title/Abstract] OR "bile duct cancer"[Title/Abstract] OR "ascites hepatoma"[Title/Abstract] OR "hepatoblastoma"[Title/Abstract] OR "liver carcinogenesis"[Title/Abstract] OR "liver cell carcinoma"[Title/Abstract] OR "liver sarcoma"[Title/Abstract] OR "bile duct carcinoma"[Title/Abstract] OR "gallbladder carcinoma"[Title/Abstract] OR "pancreas carcinoma"[Title/Abstract] OR "pancreas adenocarcinoma"[Title/Abstract] OR "pancreas islet cell carcinoma"[Title/Abstract] OR "pancreatic ductal carcinoma"[Title/Abstract] OR "Pancreatic Ductal Adenocarcinoma"[Title/Abstract] OR "pancreatic carcinoma"[Title/Abstract] OR "carcinoma of the gallbladder"[Title/Abstract] OR "pancreatobiliary carcinomas"[Title/Abstract] OR "hepatoma"[Title/Abstract] OR "pancreatic adenocarcinoma"[Title/Abstract] OR "carcinoma of the pancrea*"[Title/Abstract] | 199059 |
| **#3** | **#1 OR #2** | 340104 |
| **Instrument** | **#4** | "Surveys and Questionnaires"[MeSH Terms] OR "instrumentation"[MeSH Subheading] | 1,804578 |
| **#5** | "instrument*"[Title/Abstract] OR "scale*"[Title/Abstract] OR "questionnaire*"[Title/Abstract] OR "survey*"[Title/Abstract] OR "procedure"[Title/Abstract] OR "test"[Title/Abstract] | 4,209101 |
| **#6** | #4 OR #5 | 5,238038 |
| **Measurement properties** | **#7** | "psychometrics"[MeSH Terms] OR "outcome assessment, health care"[MeSH Terms] OR "discriminant analysis"[MeSH Terms] OR "reproducibility of results"[MeSH Terms] OR "Translations"[MeSH Terms] OR "Culture"[MeSH Terms] OR "Evaluation Studies as Topic"[MeSH Terms] OR "Sensitivity and Specificity"[MeSH Terms] OR "Psychology"[MeSH Terms] OR "Quality of Life"[MeSH Terms] OR "Self-Assessment"[MeSH Terms] OR "Symptom Assessment"[MeSH Terms] | 3,158173 |
| **#8** | "Validation Studies"[All Fields] OR "Validation Study"[All Fields] OR "Validation research*" OR "Comparative Study"[All Fields] OR "Comparative Studies"[All Fields] OR "Comparative research*"[All Fields] OR "psychometr*"[Title/Abstract] OR "clinimetr*"[Text Word] OR "clinometr*"[Text Word] OR "reproducib*"[Title/Abstract] OR "reliab*"[Title/Abstract] OR "unreliab*"[Title/Abstract] OR "valid*"[Title/Abstract] OR "coefficient"[Title/Abstract] OR "homogeneity"[Title/Abstract] OR "homogeneous"[Title/Abstract] OR "internal consistency"[Title/Abstract] OR ("cronbach*"[Title/Abstract] AND ("alpha"[Title/Abstract] OR "alphas"[Title/Abstract])) OR ("item"[Title/Abstract] AND ("correlation*"[Title/Abstract] OR "selection*"[Title/Abstract] OR "reduction*"[Title/Abstract])) OR "agreement"[Title/Abstract] OR "precision"[Title/Abstract] OR "imprecision"[Title/Abstract] OR "precise values"[Title/Abstract] OR "test-retest"[Title/Abstract] OR ("test"[Title/Abstract] AND "retest"[Title/Abstract]) OR ("reliab*"[Title/Abstract] AND ("test"[Title/Abstract] OR "retest"[Title/Abstract])) OR "stability"[Title/Abstract] OR "interrater"[Title/Abstract] OR "inter-rater"[Title/Abstract] OR "intrarater"[Title/Abstract] OR "intra-rater"[Title/Abstract] OR "interobserver"[Title/Abstract] OR "inter-observer"[Title/Abstract] OR "intraobserver"[Title/Abstract] OR "intra-observer"[Title/Abstract] OR "interindividual"[Title/Abstract] OR "inter-individual"[Title/Abstract] OR "intraindividual"[Title/Abstract] OR "intra-individual"[Title/Abstract] OR "interparticipant"[Title/Abstract] OR "inter-participant"[Title/Abstract] OR "intraparticipant"[Title/Abstract] OR "intra-participant"[Title/Abstract] OR "kappa"[Title/Abstract] OR "kappa's"[Title/Abstract] OR "kappas"[Title/Abstract] OR "repeatab*"[Title/Abstract] OR (("replicab*"[Title/Abstract] OR "repeated"[Title/Abstract]) AND ("measure"[Title/Abstract] OR "measures"[Title/Abstract] OR "findings"[Title/Abstract] OR "result"[Title/Abstract] OR "results"[Title/Abstract] OR "test"[Title/Abstract] OR "tests"[Title/Abstract])) OR "generaliza*"[Title/Abstract] OR "generalisa*"[Title/Abstract] OR ("intraclass"[Title/Abstract] AND "correlation*"[Title/Abstract]) OR "discriminative"[Title/Abstract] OR "known group"[Title/Abstract] OR "factor analysis"[Title/Abstract] OR "factor analyses"[Title/Abstract] OR "dimension*"[Title/Abstract] OR "subscale*"[Title/Abstract] OR ("multitrait"[Title/Abstract] AND "scaling"[Title/Abstract] AND ("analysis"[Title/Abstract] OR "analyses"[Title/Abstract])) OR "item discriminant"[Title/Abstract] OR "interscale correlation*"[Title/Abstract] OR "error"[Title/Abstract] OR "errors"[Title/Abstract] OR "individual variability"[Title/Abstract] OR ("variability"[Title/Abstract] AND ("analysis"[Title/Abstract] OR "values"[Title/Abstract])) OR ("uncertainty"[Title/Abstract] AND ("measurement"[Title/Abstract] OR "measuring"[Title/Abstract])) OR "standard error of measurement"[Title/Abstract] OR "sensitiv*"[Title/Abstract] OR "responsive*"[Title/Abstract] OR (("minimal"[Title/Abstract] OR "minimally"[Title/Abstract] OR "clinical"[Title/Abstract] OR "clinically"[Title/Abstract]) AND ("important"[Title/Abstract] OR "significant"[Title/Abstract] OR "detectable"[Title/Abstract]) AND ("change"[Title/Abstract] OR "difference"[Title/Abstract])) OR ("small*"[Title/Abstract] AND ("real"[Title/Abstract] OR "detectable"[Title/Abstract]) AND ("change"[Title/Abstract] OR "difference"[Title/Abstract])) OR "meaningful change"[Title/Abstract] OR "ceiling effect"[Title/Abstract] OR "floor effect"[Title/Abstract] OR "Item response model"[Title/Abstract] OR "IRT"[Title/Abstract] OR "Rasch"[Title/Abstract] OR "Differential item functioning"[Title/Abstract] OR "DIF"[Title/Abstract] OR "computer adaptive testing"[Title/Abstract] OR "Sensitivity"[Title/Abstract] OR "Specificity"[Title/Abstract] OR "reproducibility of finding*"[Title/Abstract] OR "reliability of result*"[Title/Abstract] OR "reliability epidemiology"[Title/Abstract] OR "validity epidemiology"[Title/Abstract] OR "Validity of Results"[Title/Abstract] OR "Result Validity"[Title/Abstract] OR "Face Validity"[Title/Abstract] OR "Reliability and Validity"[Title/Abstract] OR "test retest reliability"[Title/Abstract] OR "Evaluation Report"[Title/Abstract] OR "Critique"[Title/Abstract] OR "Critiques"[Title/Abstract] OR "Evaluation Research"[Title/Abstract] OR "Use-Effectiveness"[Title/Abstract] OR "Pre-Post Tests"[Title/Abstract] OR "Qualitative Evaluation"[Title/Abstract] OR "Theoretical Effectiveness"[Title/Abstract] OR "Evaluation Indexes"[Title/Abstract] OR "Evaluation Methodology"[Title/Abstract] OR "Evaluation Methodologies"[Title/Abstract] OR "Psychological Side Effect"[Title/Abstract] OR "psychosocial factor*"[Title/Abstract] OR "Psychological Factors"[Title/Abstract] OR "Psychologists"[Title/Abstract] OR "Life Quality"[Title/Abstract] OR "health related quality of life"[Title/Abstract] OR "HRQOL"[Title/Abstract] OR "Life Style"[Title/Abstract] OR "Sickness Impact Profile"[Title/Abstract] OR "Value of Life"[Title/Abstract] OR "Karnofsky Performance Status"[Title/Abstract] OR "patient relevant outcome*"[Title/Abstract] OR "Clinical Effectiveness"[Title/Abstract] OR "Treatment Effectiveness"[Title/Abstract] OR "Rehabilitation Outcome"[Title/Abstract] OR "Treatment Efficacy"[Title/Abstract] OR "Clinical Efficacy"[Title/Abstract] OR "self criticism*"[Title/Abstract] OR "symptom assessment*"[Title/Abstract] OR "Symptom Evaluation"[Title/Abstract] OR "Cultures"[Title/Abstract] OR "belief*"[Title/Abstract] OR "Customs"[Title/Abstract] OR "Cultural Relativism"[Title/Abstract] OR "cultural background*"[Title/Abstract] OR "Outcomes Assessment"[Title/Abstract] OR "outcome assessments health care"[Title/Abstract] OR "Outcomes Assessments"[Title/Abstract] OR "Outcomes Research"[Title/Abstract] OR "Outcome Studies"[Title/Abstract] OR "Outcome Study"[Title/Abstract] OR "outcome measure*"[Title/Abstract] OR "observer variation"[Title/Abstract] OR "feasibility study"[Title/Abstract] OR "Discriminant Analyses"[Title/Abstract] | 7,507393 |
| **#9** | #7 OR #8 | 9,248633 |
| **Final search strategy** | **#10** | #3 AND #6 AND #9 | 20516 |
| **#11** | ((((((#10 NOT "Interview"[Publication Type]) NOT "Review"[Publication Type]) NOT "systematic review"[Publication Type]) NOT "Comment"[Publication Type]) NOT "case reports"[Publication Type]) NOT "Letter"[Publication Type]) | 18291 |

| **Database** |  | **Cochrane library** | **Total** |
| --- | --- | --- | --- |
| **Search time** |  | 2021/12/17 (Word variations have been searched) |  |
| **Population** | **#1** | MeSH descriptor: [Liver Neoplasms] explode all trees | 3158 |
| **#2** | MeSH descriptor: [Biliary Tract Neoplasms] explode all trees | 478 |
| **#3** | MeSH descriptor: [Pancreatic Neoplasms] explode all trees | 1909 |
| **#4** | #1 OR #2 OR #3 | 5284 |
| **#5** | ("Liver Neoplasm"):ti,ab,kw OR ("hepatic neoplasm*"):ti,ab,kw OR ("Cancer of Liver"):ti,ab,kw OR ("Hepatocellular Cancer"):ti,ab,kw OR ("Hepatic Cancer"):ti,ab,kw OR ("liver cancer*"):ti,ab,kw OR ("Cancer of the Liver"):ti,ab,kw OR ("primary hepatic carcinoma"):ti,ab,kw OR ("primary liver cancer"):ti,ab,kw OR ("HCC"):ti,ab,kw OR ("PHC"):ti,ab,kw OR ("gallbladder neoplasm*"):ti,ab,kw OR ("Cancer of Gallbladder"):ti,ab,kw OR ("gallbladder cancer*"):ti,ab,kw OR ("Gall Bladder Cancer"):ti,ab,kw OR ("Cancer of the Gallbladder"):ti,ab,kw OR ("Cholangiocarcinomas"):ti,ab,kw OR ("cholangiocellular carcinoma*"):ti,ab,kw OR ("Extrahepatic Cholangiocarcinoma"):ti,ab,kw OR ("Intrahepatic Cholangiocarcinoma"):ti,ab,kw OR ("pancreatic neoplasm*"):ti,ab,kw OR ("Cancer of Pancreas"):ti,ab,kw OR ("Pancreas Cancers"):ti,ab,kw OR ("Pancreatic Cancer"):ti,ab,kw OR ("Cancer of the Pancreas"):ti,ab,kw OR ("Biliary Tract Neoplasm"):ti,ab,kw OR ("Cancer of the Biliary Tract"):ti,ab,kw OR ("Cancer of Biliary Tract"):ti,ab,kw OR ("Biliary Tract Cancer*"):ti,ab,kw OR (" bile duct cancer "):ti,ab,kw OR ("ascites hepatoma"):ti,ab,kw OR ("hepatoblastoma"):ti,ab,kw OR ("liver carcinogenesis"):ti,ab,kw OR ("liver cell carcinoma"):ti,ab,kw OR ("liver sarcoma"):ti,ab,kw OR ("bile duct carcinoma"):ti,ab,kw OR ("gallbladder carcinoma"):ti,ab,kw OR ("pancreas carcinoma"):ti,ab,kw OR ("pancreas adenocarcinoma"):ti,ab,kw OR ("pancreas islet cell carcinoma"):ti,ab,kw OR ("pancreatic ductal carcinoma"):ti,ab,kw ("Pancreatic Ductal Adenocarcinoma"):ti,ab,kw OR ("Hepatocellular Carcinoma"):ti,ab,kw OR ("pancreatic carcinoma"):ti,ab,kw OR ("carcinoma of the gallbladder"):ti,ab,kw OR ("pancreatobiliary carcinomas"):ti,ab,kw OR ("hepatoma"):ti,ab,kw OR ("pancreatic adenocarcinoma"):ti,ab,kw OR ("carcinoma of the pancrea*"):ti,ab,kw | 12538 |
| **#6** | **#4 OR #5** | 14420 |
| **Instrument** | **#7** | MeSH descriptor: [Surveys and Questionnaires] explode all trees | 57754 |
| **#8** | (instrument*):ti,ab,kw OR (scale*):ti,ab,kw OR (Questionnaire*):ti,ab,kw OR (tests):ti,ab,kw OR (survey*):ti,ab,kw OR (procedure*):ti,ab,kw | 615169 |
| **#9** | **#7 OR #8** | 629583 |
| **Measurement properties** | **#10** | MeSH descriptor: [Translations] explode all trees | 30 |
| **#11** | MeSH descriptor: [Culture] explode all trees | 2983 |
| **#12** | MeSH descriptor: [Discriminant Analysis] explode all trees | 185 |
| **#13** | MeSH descriptor: [Evaluation Studies as Topic] explode all trees | 54157 |
| **#14** | MeSH descriptor: [Sensitivity and Specificity] explode all trees | 16037 |
| **#15** | MeSH descriptor: [Reproducibility of Results] explode all trees | 11331 |
| **#16** | MeSH descriptor: [Psychology] explode all trees | 1127 |
| **#17** | MeSH descriptor: [Psychometrics] explode all trees | 2928 |
| **#18** | MeSH descriptor: [Quality of Life] explode all trees | 27155 |
| **#19** | MeSH descriptor: [Self-Assessment] explode all trees | 745 |
| **#20** | MeSH descriptor: [Symptom Assessment] explode all trees | 290 |
| **#21** | MeSH descriptor: [Outcome Assessment, Health Care] explode all trees | 156502 |
| **#22** | #10 OR #11 OR #12 OR #13 OR #14 OR #15 OR #16 OR #17 #18 OR #19 OR #20 OR #21 | 191167 |
| **#23** | ("Validation Studies" OR "Validation Study" OR "Validation research*" OR "Comparative research*" OR "Comparative Study" OR "Comparative Studies"):All Text | 209586 |
| **#24** | psychometr* OR clinimetr* OR clinometr* OR reproducib* OR reliab* OR unreliab* OR valid* OR "coefficient of variation" OR coefficient OR homogeneity OR homogeneous OR "internal consistency" OR (cronbach* AND (alpha OR alphas)) OR (item AND (correlation* OR selection* OR reduction*)) OR agreement OR precision OR imprecision OR "precise values" OR test–retest OR (test AND retest) OR (reliab* AND (test OR retest)) OR stability OR interrater OR inter-rater OR intrarater OR intra-rater OR intertester OR inter-tester OR intratester OR intra-tester OR interobserver OR inter-observer OR intraobserver OR intra-observer OR intertechnician OR inter-technician OR intratechnician OR intra-technician OR interexaminer OR inter-examiner OR intraexaminer OR intra-examiner OR interassay OR inter-assay OR intraassay OR intra-assay OR interindividual OR inter-individual OR intraindividual OR intra-individual OR interparticipant OR inter-participant OR intraparticipant OR intra-participant OR kappa OR kappa’s OR kappas OR repeatab* OR interexaminer OR inter-examiner OR intraexaminer OR intra-examiner OR interassay OR inter-assay OR intraassay OR intra-assay OR interindividual OR inter-individual OR intraindividual OR intra-individual OR interparticipant OR inter-participant OR intraparticipant OR intra-participant OR kappa OR kappa’s OR kappas OR repeatab* OR ((replicab* OR repeated) AND (measure OR measures OR findings OR result OR results OR test OR tests)) OR generaliza* OR generalisa* OR concordance OR (intraclass AND correlation*) OR discriminative OR "known group" OR "factor analysis" OR "factor analyses" OR "factor structure" OR "factor structures" OR dimension* OR subscale* OR (multitrait AND scaling AND (analysis OR analyses)) OR interexaminer OR inter-examiner OR intraexaminer OR intra-examiner OR interassay OR inter-assay OR intraassay OR intra-assay OR interindividual OR inter-individual OR intraindividual OR intra-individual OR interparticipant OR inter-participant OR intraparticipant OR intra-participant OR kappa OR kappa’s OR kappas OR repeatab* OR ((replicab* OR repeated) AND (measure OR measures OR findings OR result OR results OR test OR tests)) OR generaliza* OR generalisa* OR concordance OR (intraclass AND correlation*) OR discriminative OR "known group" OR "factor analysis" OR "factor analyses" OR "factor structure" OR "factor structures" OR dimension* OR subscale* OR (multitrait AND scaling AND (analysis OR analyses)) OR "item discriminant" OR "interscale correlation*" OR error OR errors OR "individual variability" OR "interval variability" OR "rate variability" OR (variability AND (analysis OR values)) OR (uncertainty AND (measurement OR measuring)) OR "standard error of measurement" OR sensitiv* OR responsive* OR (limit AND detection) OR "minimal detectable concentration" OR interpretab* OR ((minimal OR minimally OR clinical OR clinically) AND (important OR significant OR detectable) AND (change OR difference)) OR (small* AND (real OR detectable) AND (change OR difference)) OR "meaningful change" OR "ceiling effect" OR "floor effect" OR "Item response model" OR IRT OR Rasch OR "Differential item functioning" OR DIF OR "computer adaptive testing" OR "Sensitivity" OR "Specificity" OR "reproducibility of finding*" OR "reliability of result*" OR "reliability epidemiology" OR "validity epidemiology" OR "Validity of Results" OR "Result Validity" OR "Face Validity" OR "Reliability and Validity" OR "test retest reliability" OR "Evaluation Report" OR "Critique" OR "Critiques" OR "Evaluation Research" OR "Use-Effectiveness" OR "Pre-Post Tests" OR "Qualitative Evaluation" OR "Theoretical Effectiveness" OR "Evaluation Indexes" OR "Evaluation Methodology" OR "Evaluation Methodologies" OR "Psychological Side Effect" OR "psychosocial factor*" OR "Psychological Factors" OR "Psychologists" OR "Life Quality" OR "health related quality of life" OR "HRQOL" OR "Life Style" OR "Sickness Impact Profile" OR "Value of Life" OR "Karnofsky Performance Status" OR "patient relevant outcome*" OR "Clinical Effectiveness" OR "Treatment Effectiveness" OR "Rehabilitation Outcome" OR "Treatment Efficacy" OR "Clinical Efficacy" OR "self criticism*" OR "symptom assessment*" OR "Symptom Evaluation" OR "Cultures" OR "belief*" OR "Customs" OR "Cultural Relativism" OR "cultural background*" OR "Outcomes Assessment" OR "outcome assessments health care" OR "Outcomes Assessments" OR "Outcomes Research" OR "Outcome Studies" OR "Outcome Study" OR "outcome measure*" OR "observer variation" OR "feasibility study" OR "Discriminant Analyses" | 545985 |
| **#25** | **#22 OR #23 OR #24** | 747977 |
| **Final search strategy** | **#26** | **#6 AND #9 AND #25** | 1874 |
| **#27** | **#26 with trial** | 1822 |

| **Database** |  | **WEB OF SCIENCE CORE COLLECTION** | **Total** |
| --- | --- | --- | --- |
| **Search time** |  | 2021/12/17 |  |
| **Population** | **#1** | TS=("Liver Neoplasms" OR "Gallbladder Neoplasms" OR "Cholangiocarcinoma" OR "Pancreatic Neoplasms" OR "Liver Neoplasm" OR "hepatic neoplasm*" OR "Cancer of Liver" OR "Hepatocellular Cancer" OR "Hepatic Cancer" OR "liver cancer*" OR "Cancer of the Liver" OR "primary hepatic carcinoma" OR "primary liver cancer" OR "HCC" OR "PHC" OR "Biliary Tract Neoplasm" OR "Cancer of the Biliary Tract" OR "Cancer of Biliary Tract" OR "Biliary Tract Cancer*" OR "gallbladder neoplasm*" OR "Cancer of Gallbladder" OR "gallbladder cancer*" OR "Gall Bladder Cancer" OR "Cancer of the Gallbladder" OR "Cholangiocarcinomas" OR "cholangiocellular carcinoma*" OR "Extrahepatic Cholangiocarcinoma" OR "Intrahepatic Cholangiocarcinoma" OR "pancreatic neoplasm*" OR "Cancer of Pancreas" OR "Pancreas Cancers" OR "Pancreatic Cancer" OR "Cancer of the Pancreas" OR "bile duct cancer" OR "ascites hepatoma" OR "hepatoblastoma" OR "liver carcinogenesis" OR "liver cell carcinoma" OR "liver sarcoma" OR "bile duct carcinoma" OR "gallbladder carcinoma" OR "pancreas carcinoma" OR "pancreas adenocarcinoma" OR "pancreas islet cell carcinoma" OR "pancreatic ductal carcinoma" OR "Pancreatic Ductal Adenocarcinoma" OR "Hepatocellular Carcinoma" OR "pancreatic carcinoma" OR "carcinoma of the gallbladder" OR "pancreatobiliary carcinomas" OR "hepatoma" OR "pancreatic adenocarcinoma" OR "carcinoma of the pancrea*") | 269667 |
| **Instrument** | **#2** | TS=(instrument* OR scale* OR Questionnaire* OR measure* OR test OR survey* OR procedure*) | 10,209,605 |
| **Measurement properties** | **#3** | TS=( "psychometrics" OR "outcome assessment, health care" OR "discriminant analysis" OR "reproducibility of results" OR "Translations" OR "Culture" OR "Evaluation Studies as Topic" OR "Sensitivity and Specificity" OR "Psychology" OR "Quality of Life" OR "Self-Assessment" OR "Symptom Assessment" OR "Validation Studies" OR "Validation Study" OR "Validation research*" OR "Comparative research*" OR "Comparative Study" OR "Comparative Studies" OR "psychometrics" OR psychometr* OR clinimetr* OR clinometr* OR "reproducibility of results" OR reproducib* OR "discriminant analysis" OR reliab* OR unreliab* OR valid* OR "coefficient of variation" OR coefficient OR homogeneity OR homogeneous OR "internal consistency" OR (cronbach* AND (alpha OR alphas)) OR (item AND (correlation* OR selection* OR reduction*)) OR agreement OR precision OR imprecision OR "precise values" OR test–retest OR (test AND retest) OR (reliab* AND (test OR retest)) OR stability OR interrater OR inter-rater OR intrarater OR intra-rater OR intertester OR inter-tester OR intratester OR intra-tester OR interobserver OR inter-observer OR intraobserver OR intra-observer OR intertechnician OR inter-technician OR intratechnician OR intra-technician OR interexaminer OR inter-examiner OR intraexaminer OR intra-examiner OR interassay OR inter-assay OR intraassay OR intra-assay OR interindividual OR inter-individual OR intraindividual OR intra-individual OR interparticipant OR inter-participant OR intraparticipant OR intra-participant OR kappa OR kappa’s OR kappas OR repeatab* OR interexaminer OR inter-examiner OR intraexaminer OR intra-examiner OR interassay OR inter-assay OR intraassay OR intra-assay OR interindividual OR inter-individual OR intraindividual OR intra-individual OR interparticipant OR inter-participant OR intraparticipant OR intra-participant OR kappa OR kappa’s OR kappas OR repeatab* OR ((replicab* OR repeated) AND (measure OR measures OR findings OR result OR results OR test OR tests)) OR generaliza* OR generalisa* OR concordance OR (intraclass AND correlation*) OR discriminative OR "known group" OR "factor analysis" OR "factor analyses" OR "factor structure" OR "factor structures" OR dimension* OR subscale* OR (multitrait AND scaling AND (analysis OR analyses)) OR interexaminer OR inter-examiner OR intraexaminer OR intra-examiner OR interassay OR inter-assay OR intraassay OR intra-assay OR interindividual OR inter-individual OR intraindividual OR intra-individual OR interparticipant OR inter-participant OR intraparticipant OR intra-participant OR kappa OR kappa’s OR kappas OR repeatab* OR ((replicab* OR repeated) AND (measure OR measures OR findings OR result OR results OR test OR tests)) OR generaliza* OR generalisa* OR concordance OR (intraclass AND correlation*) OR discriminative OR "known group" OR "factor analysis" OR "factor analyses" OR "factor structure" OR "factor structures" OR dimension* OR subscale* OR (multitrait AND scaling AND (analysis OR analyses)) OR "item discriminant" OR "interscale correlation*" OR error OR errors OR "individual variability" OR "interval variability" OR "rate variability" OR (variability AND (analysis OR values)) OR (uncertainty AND (measurement OR measuring)) OR "standard error of measurement" OR sensitiv* OR responsive* OR (limit AND detection) OR "minimal detectable concentration" OR interpretab* OR ((minimal OR minimally OR clinical OR clinically) AND (important OR significant OR detectable) AND (change OR difference)) OR (small* AND (real OR detectable) AND (change OR difference)) OR "meaningful change" OR "ceiling effect" OR "floor effect" OR "Item response model" OR IRT OR Rasch OR "Differential item functioning" OR DIF OR "computer adaptive testing" OR "Sensitivity" OR "Specificity" OR "reproducibility of finding*" OR "reliability of result*" OR "reliability epidemiology" OR "validity epidemiology" OR "Validity of Results" OR "Result Validity" OR "Face Validity" OR "Reliability and Validity" OR "test retest reliability" OR "Evaluation Report" OR "Critique" OR "Critiques" OR "Evaluation Research" OR "Use-Effectiveness" OR "Pre-Post Tests" OR "Qualitative Evaluation" OR "Theoretical Effectiveness" OR "Evaluation Indexes" OR "Evaluation Methodology" OR "Evaluation Methodologies" OR "Psychological Side Effect" OR "psychosocial factor*" OR "Psychological Factors" OR "Psychologists" OR "Life Quality" OR "health related quality of life" OR "HRQOL" OR "Life Style" OR "Sickness Impact Profile" OR "Value of Life" OR "Karnofsky Performance Status" OR "patient relevant outcome*" OR "Clinical Effectiveness" OR "Treatment Effectiveness" OR "Rehabilitation Outcome" OR "Treatment Efficacy" OR "Clinical Efficacy" OR "self criticism*" OR "symptom assessment*" OR "Symptom Evaluation" OR "Cultures" OR "belief*" OR "Customs" OR "Cultural Relativism" OR "cultural background*" OR "Outcomes Assessment" OR "outcome assessments health care" OR "Outcomes Assessments" OR "Outcomes Research" OR "Outcome Studies" OR "Outcome Study" OR "outcome measure*" OR "observer variation" OR "feasibility study" OR "Discriminant Analyses" OR "Pilot Project*" OR "Pilot study OR Pilot study") | 10,543,314 |
| **Final search strategy** | **#4** | **#1 AND #2 AND #3** | 21977 |
| **#5** | **NOT Document Type:Review Articles OR Meeting Abstracts OR Book Chapters OR Letters OR News Items OR Proceedings Papers OR retracted publications OR Reprints** | 19498 |

| **Database** |  | **Embase** | **Total** |
| --- | --- | --- | --- |
| **Search time** |  | 2021/12/17 |  |
| **Population** | #1 | 'hepatobiliary system cancer'/exp OR 'pancreas cancer'/exp | 420250 |
| #2 | 'liver neoplasm':ab,ti OR 'hepatic neoplasm*':ab,ti OR 'cancer of liver':ab,ti OR 'hepatocellular cancer':ab,ti OR 'hepatic cancer':ab,ti OR 'liver cancer*':ab,ti OR 'cancer of the liver':ab,ti OR 'primary hepatic carcinoma':ab,ti OR 'primary liver cancer':ab,ti OR 'hcc':ab,ti OR 'phc':ab,ti OR 'biliary tract neoplasm':ab,ti OR 'cancer of the biliary tract':ab,ti OR 'cancer of biliary tract':ab,ti OR 'biliary tract cancer*':ab,ti OR 'gallbladder neoplasm*':ab,ti OR 'cancer of gallbladder':ab,ti OR 'gallbladder cancer*':ab,ti OR 'gall bladder cancer':ab,ti OR 'cancer of the gallbladder':ab,ti OR 'cholangiocarcinomas':ab,ti OR 'cholangiocellular carcinoma*':ab,ti OR 'extrahepatic cholangiocarcinoma':ab,ti OR 'intrahepatic cholangiocarcinoma':ab,ti OR 'pancreatic neoplasm*':ab,ti OR 'cancer of pancreas':ab,ti OR 'pancreas cancers':ab,ti OR 'pancreatic cancer':ab,ti OR 'cancer of the pancreas':ab,ti OR 'bile duct cancer':ab,ti OR 'ascites hepatoma':ab,ti OR 'hepatoblastoma':ab,ti OR 'liver carcinogenesis':ab,ti OR 'liver cell carcinoma':ab,ti OR 'liver sarcoma':ab,ti OR 'bile duct carcinoma':ab,ti OR 'gallbladder carcinoma':ab,ti OR 'pancreas carcinoma':ab,ti OR 'pancreas adenocarcinoma':ab,ti OR 'pancreas islet cell carcinoma':ab,ti OR 'pancreatic ductal carcinoma':ab,ti OR 'Pancreatic Ductal Adenocarcinoma':ab,ti OR 'Hepatocellular Carcinoma':ab,ti OR 'pancreatic carcinoma':ab,ti OR 'carcinoma of the gallbladder':ab,ti OR 'pancreatobiliary carcinomas':ab,ti OR 'hepatoma':ab,ti OR 'pancreatic adenocarcinoma':ab,ti OR 'carcinoma of the pancrea*':ab,ti | 330073 |
| **#3** | **#2 OR #3** | 493896 |
| **Instrument** | **#4** | 'questionnaire'/exp | 806751 |
| **#5** | 'instrument*':ab,ti OR 'scale*':ab,ti OR 'questionnaire*':ab,ti OR 'survey*':ab,ti OR 'test':ab,ti OR 'procedure':ab,ti | 5712084 |
| **#6** | #6 OR #7 | 5,837028 |
| **Measurement properties** | **#7** | 'comparative study'/exp OR 'psychometry'/exp OR 'outcome assessment'/exp OR 'discriminant analysis'/exp OR 'reproducibility'/exp OR 'evaluation study'/exp OR 'sensitivity and specificity'/exp OR 'psychology'/exp OR 'quality of life'/exp OR 'self evaluation'/exp OR 'symptom assessment'/exp OR 'validation study'/exp OR 'feasibility study'/exp OR 'pilot study'/exp OR "observer variation"/exp OR "validity"/exp | 4107003 |
| **#8** | 'validation studies' OR 'comparative study' OR 'validation study' OR 'comparative studies' OR 'Validation research*' OR 'Comparative research*' OR reproducib*:ab,ti OR "audit":ab,ti OR psychometr*:ab,ti OR clinimetr*:ab,ti OR clinometr*:ab,ti OR "observer variation":ab,ti OR reliab*:ab,ti OR valid*:ab,ti OR "coefficient":ab,ti OR "internal consistency":ab,ti OR (cronbach*:ab,ti AND ("alpha":ab,ti OR "alphas":ab,ti)) OR "item correlation":ab,ti OR "item correlations":ab,ti OR "item selection":ab,ti OR "item selections":ab,ti OR "item reduction":ab,ti OR "item reductions":ab,ti OR "agreement":ab,ti OR "precision":ab,ti OR "imprecision":ab,ti OR "precise values":ab,ti OR "test–retest":ab,ti OR ("test":ab,ti AND "retest":ab,ti) OR (reliab*:ab,ti AND ("test":ab,ti OR "retest":ab,ti)) OR "stability":ab,ti OR "interrater":ab,ti OR "inter-rater":ab,ti OR "intrarater":ab,ti OR "intra-rater":ab,ti OR "intertester":ab,ti OR "inter-tester":ab,ti OR "intratester":ab,ti OR "intra-tester":ab,ti OR "interobeserver":ab,ti OR "inter-observer":ab,ti OR "intraobserver":ab,ti OR "intra-observer":ab,ti OR "intertechnician":ab,ti OR "intertechnician":ab,ti OR "intratechnician":ab,ti OR "intra-technician":ab,ti OR "interexaminer":ab,ti OR "inter-examiner":ab,ti OR "intraexaminer":ab,ti OR "intraexaminer":ab,ti OR "interassay":ab,ti OR "inter-assay":ab,ti OR "intraassay":ab,ti OR "intra-assay":ab,ti OR "interindividual":ab,ti OR "inter-individual":ab,ti OR "intraindividual":ab,ti OR "intra-individual":ab,ti OR "interparticipant":ab,ti OR "inter-participant":ab,ti OR "intraparticipant":ab,ti OR "intra-participant":ab,ti OR "kappa":ab,ti OR "kappas":ab,ti OR "coefficient of variation":ab,ti OR repeatab*:ab,ti OR (replicab*:ab,ti OR "repeated":ab,ti AND ("measure":ab,ti OR "measures":ab,ti OR "findings":ab,ti OR "result":ab,ti OR "results":ab,ti OR "test":ab,ti OR "tests":ab,ti)) OR generaliza*:ab,ti OR generalisa*:ab,ti OR "concordance":ab,ti OR ("intraclass":ab,ti AND correlation*:ab,ti) OR "discriminative":ab,ti OR "known group":ab,ti OR "factor analysis":ab,ti OR "factor analyses":ab,ti OR "factor structure":ab,ti OR "factor structures":ab,ti OR "dimensionality":ab,ti OR subscale*:ab,ti OR "multitrait scaling analysis":ab,ti OR "multitrait scaling analyses":ab,ti OR "item discriminant":ab,ti OR "interscale correlation":ab,ti OR "interscale correlations":ab,ti OR ("error":ab,ti OR "errors":ab,ti AND (measure*:ab,ti OR correlat*:ab,ti OR evaluat*:ab,ti OR "accuracy":ab,ti OR "accurate":ab,ti OR "precision":ab,ti OR "mean":ab,ti)) OR "individual variability":ab,ti OR "interval variability":ab,ti OR "rate variability":ab,ti OR "variability analysis":ab,ti OR ("uncertainty":ab,ti AND ("measurement":ab,ti OR "measuring":ab,ti)) OR "standard error of measurement":ab,ti OR sensitiv*:ab,ti OR responsive*:ab,ti OR ("limit":ab,ti AND "detection":ab,ti) OR "minimal detectable concentration":ab,ti OR interpretab*:ab,ti OR (small*:ab,ti AND ("real":ab,ti OR "detectable":ab,ti) AND ("change":ab,ti OR "difference":ab,ti)) OR "meaningful change":ab,ti OR "minimal important change":ab,ti OR "minimal important difference":ab,ti OR "minimally important change":ab,ti OR "minimally important difference":ab,ti OR "minimal detectable change":ab,ti OR "minimal detectable difference":ab,ti OR "minimally detectable change":ab,ti OR "minimally detectable difference":ab,ti OR "minimal real change":ab,ti OR "minimal real difference":ab,ti OR "minimally real change":ab,ti OR "minimally real difference":ab,ti OR "ceiling effect":ab,ti OR "floor effect":ab,ti OR "item response model":ab,ti OR "irt":ab,ti OR "rasch":ab,ti OR "differential item functioning":ab,ti OR "dif":ab,ti OR "computer adaptive testing":ab,ti OR "Sensitivity":ab,ti OR "Specificity":ab,ti OR "reproducibility of finding*":ab,ti OR "reliability of result*":ab,ti OR "reliability epidemiology":ab,ti OR "validity epidemiology":ab,ti OR "Validity of Results":ab,ti OR "Result Validity":ab,ti OR "Face Validity":ab,ti OR "Reliability and Validity":ab,ti OR "test retest reliability":ab,ti OR "Evaluation Report":ab,ti OR "Critique":ab,ti OR "Critiques":ab,ti OR "Evaluation Research":ab,ti OR "Use-Effectiveness":ab,ti OR "Pre-Post Tests":ab,ti OR "Qualitative Evaluation":ab,ti OR "Theoretical Effectiveness":ab,ti OR "Evaluation Indexes":ab,ti OR "Evaluation Methodology":ab,ti OR "Evaluation Methodologies":ab,ti OR "Psychological Side Effect":ab,ti OR "psychosocial factor*":ab,ti OR "Psychological Factors":ab,ti OR "Psychologists":ab,ti OR "Life Quality":ab,ti OR "health related quality of life":ab,ti OR "HRQOL":ab,ti OR "Life Style":ab,ti OR "Sickness Impact Profile":ab,ti OR "Value of Life":ab,ti OR "Karnofsky Performance Status":ab,ti OR "patient relevant outcome*":ab,ti OR "Clinical Effectiveness":ab,ti OR "Treatment Effectiveness":ab,ti OR "Rehabilitation Outcome":ab,ti OR "Treatment Efficacy":ab,ti OR "Clinical Efficacy":ab,ti OR "self criticism*":ab,ti OR "symptom assessment*":ab,ti OR "Symptom Evaluation":ab,ti OR "Cultures":ab,ti OR "belief*":ab,ti OR "Customs":ab,ti OR "Cultural Relativism":ab,ti OR "cultural background*":ab,ti OR "Outcomes Assessment":ab,ti OR "outcome assessments health care":ab,ti OR "Outcomes Assessments":ab,ti OR "Outcomes Research":ab,ti OR "Outcome Studies":ab,ti OR "Outcome Study":ab,ti OR "outcome measure*":ab,ti OR "observer variation":ab,ti OR "feasibility study":ab,ti OR "Discriminant Analyses":ab,ti OR "Pilot Project*":ab,ti OR "Pilot studies":ab,ti | 7476668 |
| **#9** | #7 OR #8 | 9,350,755 |
| **Final search strategy** | **#10** | #3 AND #6 AND #9 | 23193 |
| **#11** | #10 NOT ('article in press'/it OR 'chapter'/it OR 'conference abstract'/it OR 'conference paper'/it OR 'conference review'/it OR 'letter'/it OR 'review'/it) | 13485 |

**Appendix 2. Characteristics of studies for the validated patient-reported outcome measures (PROMs) of hepatobiliary or pancreatic malignancies (N=29).**

| **No.** | **PROMs** | **Items** | **Publication** | **Validation country** | **Validation language** | **Population** | **Sample size** |
| --- | --- | --- | --- | --- | --- | --- | --- |
| 1 | FACT-G | 27 | Yu CL et al (2000) | Hong Kong, China | Chinese Cantonese (Hong Kong) | **Inclusion criteria:** (1) older than 18 years;(2) able to understand and give informed consent. (3) patients with cancers of one of four anatomic sites (breast cancer, nasopharynx[NPC], lung cancer, or liver cancer). | 2517（Liver cancer 241） |
| 7 | Yanez B et al (2013) | USA | English | **Inclusion criteria:** (1) at least 18 years of age; (2) had stage III or IV bladder, brain, breast, colorectal, head and neck, hepatobiliary/pancreatic, kidney, lung, ovarian, prostate or lymphoma cancer; (3) had prior experience with chemotherapy for at least two cycles (or 1 month for noncyclical chemotherapy); (4) no other primary malignancy diagnosed or treated within the previous 5 years with the exception of non-melanoma skin cancer. | 533 (Hepatobiliary cancer 50) |
| 2 | MDASI_core | 19 | Okuyama T et al (2003) | Japan | Japanese | **Inclusion criteria:** (1) had to have a pathological diagnosis of cancer; (2) must have been informed of their cancer diagnosis; (3) had to be able to understand and complete the questionnaires; (4) could not to be suffering from severe mental or cognitive disorders. | 252 (Hepatobiliary and pancreas 35) |
| 3 | WHOQOL-BREF | 26 | Lin CY et al (2019) | Taiwan, China | Chinese Mandarin (Taiwan) | **Inclusion criteria:** (1) had a diagnosis of cancer (including head and neck cancer, colorectal cancer, liver cancer, lung cancer, and gynecologic cancers) corroborated by histopathology and/or cytology; (2)were aware of their cancer diagnosis; (3)did not have any other malignancy; (4)had the ability to understand and complete the WHOQOL-BREF. | 5702 (Liver cancer 965） |
| 4 | EQ-5D | 25 | Zeng X et al (2021) | China | Chinese Mandarin (Mainland) | **Inclusion criteria:** (1) a diagnosis of one of the six cancers by an oncologist(lung, breast, liver, colorectal, thyroid, and gastric cancer); (2) without cognitive impairment; (3) aged ≥ 18 years; (4)Informed consent was obtained from all participants. | 416 (Liver cancer 67) |
| 15 | Kim SH et al (2012) | Korea | Korean | **Inclusion criteria:** (1) aged over 18 years; (2) receiving chemotherapy at an ambulatory cancer center in Korea, over 1-month period; (3) These subjects had 30 different types of cancer.  **Exclusion criteria:** (1) had a performance status of 4 on the ECOG Scale; (2) were missing or duplicate responses on the EQ-5D-3L or EQ-5D-5L questionnaire. | 893 (Pancreas cancer 39) |
| 5 | ESAS-r | 9 | Mori M et al (2018) | Japan | Japanese | **Inclusion criteria:** (1) Japanese adult patients with cancer receiving palliative care services.  **Exclusion criteria:** (1) patients with significant cognitive impairment; (2) those who were judged by the investigators to be too physically or psychologically distressed to participate in the study. | 292 (Hepatobiliary or pancreatic cancers 74) |
| Yokomichi N et al (2015) | Japan | Japanese | **Inclusion criteria:** (1) Japanese adult patients with cancer receiving palliative care services;  **Exclusion criteria:** (1) patients with significant cognitive impairment; (2) patients who were judged by the investigators to be too physically or psychologically distressed to participate in the study. | 292 (Liver cancer 24, Pancreatic cancers37, Biliary tract cancer 13） |
| Dong Y et al (2015) | China | Chinese Mandarin (Mainland) | **Inclusion criteria:** (1) older than 18 years; (2) deemed able to understand the nature of the study by treating physicians; (3) able to give informed consent; (4) patients had a cancer diagnosis, including stomach cancer, liver cancer, colon cancer, and lung cancer. | 210 (Liver cancer 70) |
| Paiva CE et al (2015) | Brazil | Brazilian | **Inclusion criteria:** (1) have been diagnosed with advanced cancer (locally advanced, relapsed or refractory or metastatic disease); (2) at least 18 years old; (3) a native Portuguese-speaking Brazilian.  **Exclusion criteria:** (1) Patients with any confusion, uncontrolled psychiatric disease, cognitive dysfunction, or any other disabling disease that could hinder their ability to answer the study questionnaires. | 293 (Pancreatic cancer 7) |
| Kwon JH et al (2013) | Korea | Korean | **Inclusion criteria：**(1) at least 20 years old; (2) able to understand written Korean; (3) patients with advanced cancer (locally advanced, relapsed or refractory, or metastatic disease) who were undergoing treatment.  **Exclusion criteria:** (1) Patients with symptomatic brain metastasis; (2) uncontrolled psychiatric disease; (3) cognitive dysfunction, including dementia or delirium. | 163 (Hepatobiliary cancer 17) |
| 6 | MSAS | 32 | Llamas Ramos I  et al (2016) | Spain | Spanish | **Inclusion criteria:** (1)patients aged between 18 and 85 years; (2) diagnosed of cancer; (3) receiving chemotherapy treatment in the Day Hospital. | 246 (Liver cancer 4, Pancreatic cancers 8 ) |
| 7 | BFI | 9 | Lin CC et al (2006) | Taiwan, China | Chinese Mandarin (Taiwan) | **Inclusion criteria:** (1) patients have a pathological diagnosis of cancer; (2) be at least 18 years old, and be able to communicate in Mandarin or Taiwanese.  **Exclusion criteria:** (1) Patients were cognitively impaired; (2) they refused to participate;(3) they could not understand the intent of this study. | 439 (Liver cancer 31) |
| 8 | BPI | 11 | Ballout S et al (2011) | Lebanon | Arabic | **Inclusion criteria:** (1) 18 years and older; (2) diagnosed with cancer, primary or metastatic;(3) complaining of pain as a result of cancer;(4) receiving treatment for pain;(5) the primary cancer sites were the gastrointestinal tract, pancreas, or liver; bladder, testicles, or prostate; and breast. The remaining sites included the lungs, hematologic system, retroperitoneal, and skin.  **Exclusion criteria:** (1) Patients who underwent surgery or an invasive procedure during the past month. | 75 (Gastrointestinal tract, Pancreas, or Liver cancer 22) |
| 9 | EORTC QLQ-HCC18 | 18 | Chie WC et al (2012) | 7 centers in 6 countries（European, Asian, others） | Chinese, Japanese, Italian, and French | **Inclusion criteria:** (1) Patients over 18 years of age; (2) with histologically confirmed HCC or specialist multidisciplinary diagnosis of HCC based on alpha-fetoprotein (AFP; >400 ng/mL) and radiological images; (3) understand the language of the questionnaire; (4) without any psychological, familial, sociological, or geographical conditions that would potentially hamper compliance with the study protocol.  **Exclusion criteria:** (1) Patients with concurrent malignancies, except basal cell carcinoma of the skin; (2) participation in other quality-of-life studies that might interfere with this study; (3) previous participation in 0this study (in a different subgroup). | HCC 227 |
| Serrano D et al (2021) | 45 international centers (Asian, Black or African American, white, etc.) | English | **Inclusion criteria:** (1) adults (≥ 18 years of age) with histologically confirmed HCC that was not amenable to a curative treatment approach; (2)who had received ≥ 1 line of systematic therapy for unresectable HCC; (3) patients were BCLC stage C or B not amenable to locoregional therapy or relapsed after locoregional therapy, and not amenable to a curative treatment approach; (4) Patients also had a Child–Pugh A classification; (5) All patients were required to have an Eastern Cooperative Oncology Group (ECOG) performance status score of ≤ 1 . | HCC 248 |
| Yang Z et al (2015) | China | Chinese Mandarin (Mainland) | **Inclusion criteria:** (1) HCC inpatients at any stages and treatments; (2) were able to read and understand the questionnaires.  **Exclusion criteria:** (1) Patients who were illiterate and those with advance disease status. | HCC 114 |
| Mikoshiba N  et al (2012) | Japan | Japanese | **Inclusion criteria:** (1) patients diagnosed with HCC; (2) age>20 years; (3) ability to communicate in Japanese; (4) ability to participate in this study, as judged by an attending doctor; (5) confirmation of medical diagnosis; (6) no other concurrent malignancy; (7) consent to participate in this study. | HCC 192 |
| Kim GA et al (2019) | Korea | Korean | **Inclusion criteria:** (1) age older than 18 years;(2) radiologically or histologically confirmed HCC;(3) proficient in Korean for understanding the questionnaire;(4) provision of informed consent;(5) HCC was diagnosed either radiologically or pathologically following the American Association for the Study of Liver Diseases (AASLD) guidelines;(6) Liver cirrhosis was clinically diagnosed on the basis of imaging features.  **Exclusion criteria:** (1) patients had concurrent malignancies;(2)patients had mental problems that could hinder the survey. | HCC 300 |
| 10 | EORTC QLQ-LMC21 | 21 | Blazeby JM et al (2009) | UK, France, Germany | English, French, Germany | **Inclusion criteria:** (1) patients had a histological diagnosis of adenocarcinoma of the colon or rectum and hepatic metastases; (2) with an expected survival time of at least 4 weeks; (3) There were no limitations with respect to age or performance status.  **Exclusion criteria:** (1)concurrent malignancies (except basal cell carcinoma of the skin), inability to understand and complete the questionnaire; (2) participation in another questionnaire study. | Liver metastasis from CRC 356 |
| Paradowska D et al (2017) | Poland | Polish | **Inclusion criteria:** (1) be 18 years of age or older; (2) have colorectal cancer with liver metastasis, confirmed by either histopathology or imaging; (3) with a minimum estimated survival of 3 months.  **Exclusion criteria:** (1) lack of consent to participate in the study; (2) the inability to understand or complete the questionnaires; (3) had concurrent malignancies (except basal cell carcinoma of the skin). | Liver metastasis from CRC 160 |
| Tomim DH et al (2022) | Brazil | Brazilian | **Inclusion criteria:** (1) had liver metastasis from CRC confirmed with imaging and/or histopathological examinations; (2) were aged over 18 years old; (3)received chemotherapy treatment. | Liver metastasis from CRC 106 |
| 11 | EORTC QLQ-BIL21 | 21 | Kaupp-Roberts SD et al (2016) | United Kingdom, Germany, Netherlands, Italy, Chile, India , China | English, German, Dutch, Italian, Spanish,  Mandarin Chinese, Haitian | **Inclusion criteria:** (1) aged 18 years or above; (2) with a diagnosis of cholangiocarcinoma or gallbladder cancer confirmed by histology or MDT (multidisciplinary team) opinion; (3) were able to give written informed consent; (4) had no prior history of other significant malignant disease; (5) were able to understand the language of the questionnaire; (6) had an expected minimum survival of 3 months.  **Exclusion criteria:** (1) there was concurrent malignant disease elsewhere (except basal cell carcinoma of the skin); (2) prior surgery with curative intent had taken place (with no evidence of recurrence); (3) psychological, familial, sociological or geographical reasons would hamper compliance with the study protocol. | Cholangiocarcinoma or gallbladder cancer 263 |
| 12 | FACT-Hep | 45 | Heffernan N et al (2002) | USA | English | **Inclusion criteria:** (1)18 years of age or older; (2) diagnosis of cancer of the liver (primary or metastatic), pancreas, gallbladder, or bile duct; (3) ability to speak, read, and write English.  **Exclusion criteria:** (1) evidence of cognitive impairment or psychiatric disturbance that would prevent the patient from giving informed consent ; (2) physical condition that would render 30 to 50 minutes of testing too physically demanding. | Cancer of the liver (primary or metastatic), pancreas, gallbladder, or bile duct 51 |
| Cella D et al (2013) | USA | English | **Inclusion criteria:** (1) patients had histologically or cytologically confirmed metastatic adenocarcinoma of the pancreas (American Joint Committee on Cancer [AJCC] Stage IV) ;(2) had an ECOG score of 0 or 1 and were C18 years old.  **Exclusion criteria:** (1) they were receiving adjuvant chemotherapy, chemoradiotherapy; (2) had prior or current treatment with biologic, small molecule, immunotherapy, chemotherapy (e.g. gemcitabine), radiotherapy or other agents for pancreatic cancer. | Metastatic adenocarcinoma of the pancreas 125 |
| 13 | FHSI-8 | 8 | Yount S et al (2002) | USA | English | **Inclusion criteria:** (1) 18 years of age or older; (2) diagnosis of cancer of the liver, pancreas, gallbladder, or bile duct; (3) ability to speak, read, and write English.  **Exclusion criteria:** (1) psychiatric history; (2) Reasons for refusal included fatigue and concern about participating in research. | Liver, Pancreas, Gallbladder, or Bile duct cancer 51 |
| 14 | FHSI-18 | 18 | Butt Z et al (2012) | USA | English | **Inclusion criteria:** (1) at least 18 years of age; (2) had stage III or IV hepatobiliary or pancreatic cancer; (3) patients could not have any other primary malignancy in the previous 5 years, except nonmelanoma skin cancer; (4) patients must have had at least 2 cycles of chemotherapy (or 1 month of treatment with noncyclicalchemotherapy). | Pancreatic cancer 50 |
| 15 | MDASI-PeriOp-Hep | 18 | Wang XS et al (2021) | USA | English | **Inclusion criteria:** (1) at least 18 years old; (2) spoke English; (3) were diagnosed with either a primary or secondary malignancy of the live; (4) understood the study’s intent, and provided written informed consent. | Live cancer 150 |
| 16 | QOL-LC | 22 | Wan CH et al (2010) | China | Chinese Mandarin (Mainland) | **Inclusion criteria:** (1) limited to liver cancer inpatients at any stages and treatments; (2) were able to read and understand the questionnaires. | Live cancer 105 |

**Appendix 3. Patient-reported symptom item bank for patients with hepatobiliary or pancreatic malignancies.**

| **NO.** | **Symptom** | **PROMs** | **NO.** | **Items** | **Recall period** | **Response scale** | **Assessment** | **Validation population** |
| --- | --- | --- | --- | --- | --- | --- | --- | --- |
| 1 | **Pain** | EORTC QLQ-C30 | 1 | Have you had pain? | During the past week | VRS_1-4 | Intensity | Hepatobiliary cancer，Pancreatic cancer, Cholangiocarcinoma or gallbladder cancer, Liver metastasis from colorectal cancer |
| EORTC QLQ-C30 | 2 | Did pain interfere with your daily activities? | During the past week | VRS_1-4 | Interference | Hepatobiliary cancer，Pancreatic cancer, Cholangiocarcinoma or gallbladder cancer, Liver metastasis from colorectal cancer |
| EORTC QLQ-BIL21 | 3 | Did you have pain during the night? | During the past week | VRS_1-4 | Intensity | Cholangiocarcinoma or gallbladder cancer |
| FACT-G | 4 | I have pain | Past 7 days | VRS_0-4 | Intensity | Hepatobiliary cancer |
| FACT-Hep | 5 | I have pain | Past 7 days | VRS_0-4 | Intensity | Hepatobiliary cancer (primary or metastatic)，Pancreatic cancer (primary or metastatic), Cholangiocarcinoma or gallbladder cancer |
| FHSI-8 | 6 | I have pain | Past 7 days | VRS_0-4 | Intensity | Hepatobiliary cancer，Pancreatic cancer, Cholangiocarcinoma or gallbladder cancer |
| FHSI-18 | 7 | I have pain | Past 7 days | VRS_0-4 | Intensity | Pancreatic cancer |
| WHOQOL-BREF | 8 | To what extent do you feel that physical pain prevents you from doing what you need to do? | Last two weeks | VRS_1-5 | Interference | Hepatobiliary cancer |
| MDASI | 9 | Your pain at its worst? | In the last 24 hours | NRS_0-10 | Intensity | Hepatobiliary cancer，Pancreatic cancer |
| ESAS-r | 10 | Pain | Now | NRS_0-10 | Intensity | Hepatobiliary cancer，Pancreatic cancer, Biliary tract cancer |
| MSAS | 11 | How OFTEN did you have it? Pain | During this past week | VRS_1-4 | Frequency | Hepatobiliary cancer，Pancreatic cancer |
| MSAS | 12 | How SEVERE was it usually? Pain | During this past week | VRS_1-4 | Intensity | Hepatobiliary cancer，Pancreatic cancer |
| MSAS | 13 | How much did it DISTRESS or BOTHER you? Pain | During this past week | VRS_0-4 | Interference | Hepatobiliary cancer，Pancreatic cancer |
| BPI | 14 | Throughout our lives, most of us have had pain from time to time (such as minor headaches, sprains, and toothaches). Have you had pain other than these everydav kinds of pain today? | Today | Binary items (yes/no) | Frequency | Hepatobiliary cancer，Pancreatic cancer |
| BPI | 15 | Please rate your pain by circling the one number that best describes your pain at its worst in the last 24 hours. | In the last 24 hours | NRS_0-10 | Intensity | Hepatobiliary cancer，Pancreatic cancer |
| BPI | 16 | Please rate your pain by circling the one number that best describes your pain at its least in the last 24 hours. | In the last 24 hours | NRS_0-10 | Intensity | Hepatobiliary cancer，Pancreatic cancer |
| BPI | 17 | Please rate your pain by circling the one number that best describes your pain on the average. | In the last 24 hours | NRS_0-10 | Intensity | Hepatobiliary cancer，Pancreatic cancer |
| BPI | 18 | Please rate your pain by circling the one number that tells how much pain you have right now. | Right Now | NRS_0-10 | Intensity | Hepatobiliary cancer，Pancreatic cancer |
| BPI | 19 | In the last 24 hours, how much relief have pain treatments or medications provided? Please circle the one percentage that most shows how much relief you have received | In the last 24 hours | NRS_0-10 | Relief | Hepatobiliary cancer，Pancreatic cancer |
| BPI | 20 | Circle the one number that describes how, during the past 24 hours, pain has interfered with your: General Activity. | during the past 24 hours | NRS_0-10 | Interference | Hepatobiliary cancer，Pancreatic cancer |
| BPI | 21 | Circle the one number that describes how, during the past 24 hours, pain has interfered with your: Mood. | in the last 24 hours | NRS_0-10 | Interference | Hepatobiliary cancer，Pancreatic cancer |
| BPI | 22 | Circle the one number that describes how, during the past 24 hours, pain has interfered with your: Walking Ability. | during the past 24 hours | NRS_0-10 | Interference | Hepatobiliary cancer，Pancreatic cancer |
| BPI | 23 | Circle the one number that describes how, during the past 24 hours, pain has interfered with your: Normal work (includes both work outside the home and housework). | during the past 24 hours | NRS_0-10 | Interference | Hepatobiliary cancer，Pancreatic cancer |
| BPI | 24 | Circle the one number that describes how, during the past 24 hours, pain has interfered with your: Relations with other people. | during the past 24 hours | NRS_0-10 | Interference | Hepatobiliary cancer，Pancreatic cancer |
| BPI | 25 | Circle the one number that describes how, during the past 24 hours, pain has interfered with your: Sleep. | during the past 24 hours | NRS_0-10 | Interference | Hepatobiliary cancer，Pancreatic cancer |
| BPI | 26 | Circle the one number that describes how, during the past 24 hours, pain has interfered with your: Enjoyment of life. | during the past 24 hours | NRS_0-10 | Interference | Hepatobiliary cancer，Pancreatic cancer |
| EQ-5D-3L | 27 | Pain/discomfort | Today | VRS_1-3 | Intensity | Hepatobiliary cancer，Pancreatic cancer |
| EQ-5D-5L | 28 | Pain/discomfort | Today | VRS_1-5 | Intensity | Hepatobiliary cancer，Pancreatic cancer |
| 2 | **Shoulder pain** | EORTC QLQ-HCC18 | 29 | Have you had pain in your shoulder? | During the past week | VRS_1-4 | Intensity | Hepatobiliary cancer |
| 3 | **Back pain** | EORTC QLQ-LMC21 | 30 | Have you had pain in your back? | During the past week | VRS_1-4 | Intensity | Liver metastasis from colorectal cancer |
| EORTC QLQ-BIL21 | 31 | Have you had pain in your back? | During the past week | VRS_1-4 | Intensity | Cholangiocarcinoma or gallbladder cancer |
| FACT-Hep | 32 | I have pain in my back | Past 7 days | VRS_0-4 | Intensity | Hepatobiliary cancer (primary or metastatic)，Pancreatic cancer (primary or metastatic), Cholangiocarcinoma or gallbladder cancer |
| FHSI-8 | 33 | I have pain in my back | Past 7 days | VRS_0-4 | Intensity | Hepatobiliary cancer，Pancreatic cancer, Cholangiocarcinoma or gallbladder cancer |
| FHSI-18 | 34 | I have pain in my back | Past 7 days | VRS_0-4 | Intensity | Pancreatic cancer |
| 4 | **Abdominal pain** | EORTC QLQ-HCC18 | 35 | Have you had abdominal pain? | During the past week | VRS_1-4 | Intensity | Hepatobiliary cancer |
| 5 | **Discomfort or pain in stomach** | EORTC QLQ-LMC21 | 36 | Have you had pain in your stomach area? | During the past week | VRS_1-4 | Intensity | Liver metastasis from colorectal cancer |
| EORTC QLQ-LMC21 | 37 | Have you had discomfort in your stomach area? | During the past week | VRS_1-4 | Intensity | Liver metastasis from colorectal cancer |
| EORTC QLQ-BIL21 | 38 | Have you had pain in your stomach area? | During the past week | VRS_1-4 | Intensity | Cholangiocarcinoma or gallbladder cancer |
| FACT-Hep | 39 | I have discomfort or pain in my stomach area | Past 7 days | VRS_0-4 | Intensity | Hepatobiliary cancer (primary or metastatic)，Pancreatic cancer (primary or metastatic), Cholangiocarcinoma or gallbladder cancer |
| FACT-Hep | 40 | I have swelling or cramps in my stomach area | Past 7 days | VRS_0-4 | Intensity | Hepatobiliary cancer (primary or metastatic)，Pancreatic cancer (primary or metastatic), Cholangiocarcinoma or gallbladder cancer |
| FHSI-8 | 41 | I have discomfort or pain in my stomach | Past 7 days | VRS_0-4 | Intensity | Hepatobiliary cancer，Pancreatic cancer, Cholangiocarcinoma or gallbladder cancer |
| FHSI-18 | 42 | I have discomfort or pain in my stomach area | Past 7 days | VRS_0-4 | Intensity | Pancreatic cancer |
| 6 | **Nausea** | EORTC QLQ-C30 | 43 | Have you felt nauseated? | During the past week | VRS_1-4 | Intensity | Hepatobiliary cancer，Pancreatic cancer, Cholangiocarcinoma or gallbladder cancer, Liver metastasis from colorectal cancer |
| FACT-G | 44 | I have nausea | Past 7 days | VRS_0-4 | Intensity | Hepatobiliary cancer |
| FACT-Hep | 45 | I have nausea | Past 7 days | VRS_0-4 | Intensity | Hepatobiliary cancer (primary or metastatic)，Pancreatic cancer (primary or metastatic), Cholangiocarcinoma or gallbladder cancer |
| FHSI-8 | 46 | I have nausea | Past 7 days | VRS_0-4 | Intensity | Hepatobiliary cancer，Pancreatic cancer, Cholangiocarcinoma or gallbladder cancer |
| FHSI-18 | 47 | I have nausea | Past 7 days | VRS_0-4 | Intensity | Pancreatic cancer |
| MDASI | 48 | Your nausea at its worst? | In the last 24 hours | NRS_0-10 | Intensity | Hepatobiliary cancer，Pancreatic cancer |
| ESAS-r | 49 | Nausea | Now | NRS_0-10 | Intensity | Hepatobiliary cancer，Pancreatic cancer, Biliary tract cancer |
| MSAS | 50 | How OFTEN did you have it? Nausea | During this past week | VRS_1-4 | Frequency | Hepatobiliary cancer，Pancreatic cancer |
| MSAS | 51 | How SEVERE was it usually? Nausea | During this past week | VRS_1-4 | Intensity | Hepatobiliary cancer，Pancreatic cancer |
| MSAS | 52 | How much did it DISTRESS or BOTHER you? Nausea | During this past week | VRS_0-4 | Interference | Hepatobiliary cancer，Pancreatic cancer |
| 7 | **Vomiting** | EORTC QLQ-C30 | 53 | Have you vomited? | During the past week | VRS_1-4 | Intensity | Hepatobiliary cancer，Pancreatic cancer, Cholangiocarcinoma or gallbladder cancer, Liver metastasis from colorectal cancer |
| MDASI | 54 | Your vomiting at its worst? | In the last 24 hours | NRS_0-10 | Intensity | Hepatobiliary cancer，Pancreatic cancer |
| MSAS | 55 | How OFTEN did you have it? Vomiting | During this past week | VRS_1-4 | Frequency | Hepatobiliary cancer，Pancreatic cancer |
| MSAS | 56 | How SEVERE was it usually? Vomiting | During this past week | VRS_1-4 | Intensity | Hepatobiliary cancer，Pancreatic cancer |
| MSAS | 57 | How much did it DISTRESS or BOTHER you? Vomiting | During this past week | VRS_0-4 | Interference | Hepatobiliary cancer，Pancreatic cancer |
| 8 | **Dry mouth** | EORTC QLQ-HCC18 | 58 | Did you feel thirsty? | During the past week | VRS_1-4 | Intensity | Hepatobiliary cancer |
| EORTC QLQ-LMC21 | 59 | Have you had a dry mouth? | During the past week | VRS_1-4 | Intensity | Liver metastasis from colorectal cancer |
| FACT-Hep | 60 | My mouth is dry | Past 7 days | VRS_0-4 | Intensity | Hepatobiliary cancer (primary or metastatic)，Pancreatic cancer (primary or metastatic), Cholangiocarcinoma or gallbladder cancer |
| MDASI | 61 | Your having a dry mouth at its worst？ | In the last 24 hours | NRS_0-10 | Intensity | Hepatobiliary cancer，Pancreatic cancer |
| MSAS | 62 | How OFTEN did you have it? Dry mouth | During this past week | VRS_1-4 | Frequency | Hepatobiliary cancer，Pancreatic cancer |
| MSAS | 63 | How SEVERE was it usually? Dry mouth | During this past week | VRS_1-4 | Intensity | Hepatobiliary cancer，Pancreatic cancer |
| MSAS | 64 | How much did it DISTRESS or BOTHER you? Dry mouth | During this past week | VRS_0-4 | Interference | Hepatobiliary cancer，Pancreatic cancer |
| 9 | **Taste changes** | EORTC QLQ-HCC18 | 65 | Have you had problems with your sense of taste? | During the past week | VRS_1-4 | Intensity | Hepatobiliary cancer |
| EORTC QLQ-LMC21 | 66 | Have you had problems with your sense of taste? | During the past week | VRS_1-4 | Intensity | Liver metastasis from colorectal cancer |
| EORTC QLQ-BIL21 | 67 | Have you had problems with your sense of taste? | During the past week | VRS_1-4 | Intensity | Cholangiocarcinoma or gallbladder cancer |
| FACT-Hep | 68 | I have had a change in the way food tastes | Past 7 days | VRS_0-4 | Intensity | Hepatobiliary cancer (primary or metastatic)，Pancreatic cancer (primary or metastatic), Cholangiocarcinoma or gallbladder cancer |
| MSAS | 69 | How SEVERE was it usually? Change in the way food tastes | During this past week | VRS_1-4 | Intensity | Hepatobiliary cancer，Pancreatic cancer |
| MSAS | 70 | How much did it DISTRESS or BOTHER you? Change in the way food tastes | During this past week | VRS_0-4 | Interference | Hepatobiliary cancer，Pancreatic cancer |
| 10 | **Lack of appetite** | EORTC QLQ-C30 | 71 | Have you lacked appetite? | During the past week | VRS_1-4 | Intensity | Hepatobiliary cancer，Pancreatic cancer, Cholangiocarcinoma or gallbladder cancer, Liver metastasis from colorectal cancer |
| FACT-Hep | 72 | I have a good appetite | Past 7 days | VRS_0-4 | Intensity | Hepatobiliary cancer (primary or metastatic)，Pancreatic cancer (primary or metastatic), Cholangiocarcinoma or gallbladder cancer |
| FHSI-18 | 73 | I have a good appetite | Past 7 days | VRS_0-4 | Intensity | Pancreatic cancer |
| MDASI | 74 | Your problem with lack of appetite at its worst? | In the last 24 hours | NRS_0-10 | Intensity | Hepatobiliary cancer，Pancreatic cancer |
| ESAS-r | 75 | Lack of appetite | Now | NRS_0-10 | Intensity | Hepatobiliary cancer，Pancreatic cancer, Biliary tract cancer |
| MSAS | 76 | How OFTEN did you have it? Lack of appetite | During this past week | VRS_1-4 | Frequency | Hepatobiliary cancer，Pancreatic cancer |
| MSAS | 77 | How SEVERE was it usually? Lack of appetite | During this past week | VRS_1-4 | Intensity | Hepatobiliary cancer，Pancreatic cancer |
| MSAS | 78 | How much did it DISTRESS or BOTHER you? Lack of appetite | During this past week | VRS_0-4 | Interference | Hepatobiliary cancer，Pancreatic cancer |
| 11 | **Diarrhea** | EORTC QLQ-C30 | 79 | Have you had diarrhea? | During the past week | VRS_1-4 | Intensity | Hepatobiliary cancer，Pancreatic cancer, Cholangiocarcinoma or gallbladder cancer, Liver metastasis from colorectal cancer |
| FACT-Hep | 80 | I have diarrhea (diarrhoea) | Past 7 days | VRS_0-4 | Intensity | Hepatobiliary cancer (primary or metastatic)，Pancreatic cancer (primary or metastatic), Cholangiocarcinoma or gallbladder cancer |
| MSAS | 81 | How OFTEN did you have it? Diarrhea | During this past week | VRS_1-4 | Frequency | Hepatobiliary cancer，Pancreatic cancer |
| MSAS | 82 | How SEVERE was it usually? Diarrhea | During this past week | VRS_1-4 | Intensity | Hepatobiliary cancer，Pancreatic cancer |
| MSAS | 83 | How much did it DISTRESS or BOTHER you? Diarrhea | During this past week | VRS_0-4 | Interference | Hepatobiliary cancer，Pancreatic cancer |
| 12 | **Bloating** | EORTC QLQ-HCC18 | 84 | Have you had abdominal swelling? | During the past week | VRS_1-4 | Intensity | Hepatobiliary cancer |
| EORTC QLQ-BIL21 | 85 | Did you have a bloated feeling in your abdomen? | During the past week | VRS_1-4 | Intensity | Cholangiocarcinoma or gallbladder cancer |
| MSAS | 86 | How OFTEN did you have it? Feeling bloated | During this past week | VRS_1-4 | Frequency | Hepatobiliary cancer，Pancreatic cancer |
| MSAS | 87 | How SEVERE was it usually? Feeling bloated | During this past week | VRS_1-4 | Intensity | Hepatobiliary cancer，Pancreatic cancer |
| MSAS | 88 | How much did it DISTRESS or BOTHER you? Feeling bloated | During this past week | VRS_0-4 | Interference | Hepatobiliary cancer，Pancreatic cancer |
| 13 | **Constipation** | EORTC QLQ-C30 | 89 | Have you been constipated? | During the past week | VRS_1-4 | Intensity | Hepatobiliary cancer，Pancreatic cancer, Cholangiocarcinoma or gallbladder cancer, Liver metastasis from colorectal cancer |
| FACT-Hep | 90 | I am bothered by constipation | Past 7 days | VRS_0-4 | Intensity | Hepatobiliary cancer (primary or metastatic)，Pancreatic cancer (primary or metastatic), Cholangiocarcinoma or gallbladder cancer |
| MSAS | 91 | How SEVERE was it usually? Constipation | During this past week | VRS_1-4 | Intensity | Hepatobiliary cancer，Pancreatic cancer |
| MSAS | 92 | How much did it DISTRESS or BOTHER you? Constipation | During this past week | VRS_0-4 | Interference | Hepatobiliary cancer，Pancreatic cancer |
| 14 | **Jaundice** | EORTC QLQ-HCC18 | 93 | Have you been concerned by your skin or eyes being yellow (jaundiced)? | During the past week | VRS_1-4 | Interference | Hepatobiliary cancer |
| EORTC QLQ-LMC21 | 94 | Have your skin or eyes been yellow (jaundiced)? | During the past week | VRS_1-4 | Intensity | Liver metastasis from colorectal cancer |
| EORTC QLQ-BIL21 | 95 | Have your skin or eyes been yellow (jaundiced)? | During the past week | VRS_1-4 | Intensity | Cholangiocarcinoma or gallbladder cancer |
| EORTC QLQ-BIL21 | 96 | Have you been worried about your skin being yellow? | During the past week | VRS_1-4 | Interference | Cholangiocarcinoma or gallbladder cancer |
| FACT-Hep | 97 | I am bothered by jaundice or yellow color to my skin | Past 7 days | VRS_0-4 | Interference | Hepatobiliary cancer (primary or metastatic)，Pancreatic cancer (primary or metastatic), Cholangiocarcinoma or gallbladder cancer |
| FHSI-8 | 98 | I am bothered by jaundice or yellow color to my skin | Past 7 days | VRS_0-4 | Interference | Hepatobiliary cancer，Pancreatic cancer, Cholangiocarcinoma or gallbladder cancer |
| FHSI-18 | 99 | I am bothered by jaundice or yellow color to my skin | Past 7 days | VRS_0-4 | Interference | Pancreatic cancer |
| 15 | **Itching** | EORTC QLQ-HCC18 | 100 | Have you had itching? | During the past week | VRS_1-4 | Intensity | Hepatobiliary cancer |
| EORTC QLQ-BIL21 | 101 | Have you had itching? | During the past week | VRS_1-4 | Intensity | Cholangiocarcinoma or gallbladder cancer |
| FACT-Hep | 102 | I have had itching | Past 7 days | VRS_0-4 | Intensity | Hepatobiliary cancer (primary or metastatic)，Pancreatic cancer (primary or metastatic), Cholangiocarcinoma or gallbladder cancer |
| MSAS | 103 | How OFTEN did you have it? Itching | During this past week | VRS_1-4 | Frequency | Hepatobiliary cancer，Pancreatic cancer |
| MSAS | 104 | How SEVERE was it usually? Itching | During this past week | VRS_1-4 | Intensity | Hepatobiliary cancer，Pancreatic cancer |
| MSAS | 105 | How much did it DISTRESS or BOTHER you? Itching | During this past week | VRS_0-4 | Interference | Hepatobiliary cancer，Pancreatic cancer |
| 16 | **Fever** | EORTC QLQ-HCC18 | 106 | Have you had fevers? | During the past week | VRS_1-4 | Intensity | Hepatobiliary cancer |
| FACT-Hep | 107 | I have had fevers (episodes of high body temperature) | Past 7 days | VRS_0-4 | Intensity | Hepatobiliary cancer (primary or metastatic)，Pancreatic cancer (primary or metastatic), Cholangiocarcinoma or gallbladder cancer |
| 17 | **Chill** | EORTC QLQ-HCC18 | 108 | Have you had chills? | During the past week | VRS_1-4 | Intensity | Hepatobiliary cancer |
| FACT-Hep | 109 | I have had chills | Past 7 days | VRS_0-4 | Intensity | Hepatobiliary cancer (primary or metastatic)，Pancreatic cancer (primary or metastatic), Cholangiocarcinoma or gallbladder cancer |
| 18 | **Early satiety** | EORTC QLQ-HCC18 | 110 | Have you felt full up too quickly after beginning to eat? | During the past week | VRS_1-4 | Intensity | Hepatobiliary cancer |
| EORTC QLQ-LMC21 | 111 | Have you felt full up too quickly after beginning to eat? | During the past week | VRS_1-4 | Intensity | Liver metastasis from colorectal cancer |
| EORTC QLQ-BIL21 | 112 | Have you felt full up too quickly after beginning to eat? | During the past week | VRS_1-4 | Intensity | Cholangiocarcinoma or gallbladder cancer |
| 19 | **Weight loss** | EORTC QLQ-HCC18 | 113 | Have you worried about your weight being too low? | During the past week | VRS_1-4 | Interference | Hepatobiliary cancer |
| EORTC QLQ-LMC21 | 114 | Have you worried about losing weight? | During the past week | VRS_1-4 | Interference | Liver metastasis from colorectal cancer |
| EORTC QLQ-BIL21 | 115 | Have you worried about losing weight? | During the past week | VRS_1-4 | Interference | Cholangiocarcinoma or gallbladder cancer |
| FACT-Hep | 116 | I am losing weight | Past 7 days | VRS_0-4 | Intensity | Hepatobiliary cancer (primary or metastatic)，Pancreatic cancer (primary or metastatic), Cholangiocarcinoma or gallbladder cancer |
| FHSI-8 | 117 | I am losing weight | Past 7 days | VRS_0-4 | Intensity | Hepatobiliary cancer，Pancreatic cancer, Cholangiocarcinoma or gallbladder cancer |
| FHSI-18 | 118 | I am losing weight | Past 7 days | VRS_0-4 | Intensity | Pancreatic cancer |
| MSAS | 119 | How SEVERE was it usually? Weight loss | During this past week | VRS_1-4 | Intensity | Hepatobiliary cancer，Pancreatic cancer |
| MSAS | 120 | How much did it DISTRESS or BOTHER you? Weight loss | During this past week | VRS_0-4 | Interference | Hepatobiliary cancer，Pancreatic cancer |
| 20 | **Fatigue** | EORTC QLQ-C30 | 121 | Did you need to rest? | During the past week | VRS_1-4 | Intensity | Hepatobiliary cancer，Pancreatic cancer, Cholangiocarcinoma or gallbladder cancer, Liver metastasis from colorectal cancer |
| EORTC QLQ-C30 | 122 | Have you felt weak? | During the past week | VRS_1-4 | Intensity | Hepatobiliary cancer，Pancreatic cancer, Cholangiocarcinoma or gallbladder cancer, Liver metastasis from colorectal cancer |
| EORTC QLQ-C30 | 123 | Were you tired? | During the past week | VRS_1-4 | Intensity | Hepatobiliary cancer，Pancreatic cancer, Cholangiocarcinoma or gallbladder cancer, Liver metastasis from colorectal cancer |
| EORTC QLQ-HCC18 | 124 | Have you been less active than you would like to be? | During the past week | VRS_1-4 | Intensity | Hepatobiliary cancer |
| EORTC QLQ-HCC18 | 125 | Have you needed to sleep during the day? | During the past week | VRS_1-4 | Intensity | Hepatobiliary cancer |
| EORTC QLQ-LMC21 | 126 | Have you been less active than you would like to be? | During the past week | VRS_1-4 | Intensity | Liver metastasis from colorectal cancer |
| EORTC QLQ-LMC21 | 127 | Have you felt‘slowed down’? | During the past week | VRS_1-4 | Intensity | Liver metastasis from colorectal cancer |
| EORTC QLQ-BIL21 | 128 | Have you been less active than you would like to be? | During the past week | VRS_1-4 | Intensity | Cholangiocarcinoma or gallbladder cancer |
| EORTC QLQ-BIL21 | 129 | Have you felt “slowed down”? | During the past week | VRS_1-4 | Intensity | Cholangiocarcinoma or gallbladder cancer |
| FACT-Hep | 130 | I feel fatigued | Past 7 days | VRS_0-4 | Intensity | Hepatobiliary cancer (primary or metastatic)，Pancreatic cancer (primary or metastatic), Cholangiocarcinoma or gallbladder cancer |
| FHSI-8 | 131 | I feel fatigued | Past 7 days | VRS_0-4 | Intensity | Hepatobiliary cancer，Pancreatic cancer, Cholangiocarcinoma or gallbladder cancer |
| FHSI-18 | 132 | I feel fatigued | Past 7 days | VRS_0-4 | Intensity | Pancreatic cancer |
| BFI | 133 | Throughout our lives, most of us have times when we feel very tired or fatigued.Have you felt unusually tired or fatigued in the last week? | In the last week | binary items (yes/no) | Frequency | Hepatobiliary cancer |
| BFI | 134 | Please rate your fatigue (weariness, tiredness) by circling the one number that best describes your fatigue right now | Right Now | NRS_0-10 | Intensity | Hepatobiliary cancer |
| BFI | 135 | Please rate your fatigue (weariness, tiredness) by circling the one number that best describes your USUAL level of fatigue during past 24 hours. | During past 24 hours | NRS_0-10 | Intensity | Hepatobiliary cancer |
| BFI | 136 | Please rate your fatigue (weariness, tiredness) by circling the one number that best describes your WORST level of fatigue during past 24 hours. | During past 24 hours | NRS_0-10 | Intensity | Hepatobiliary cancer |
| BFI | 137 | Circle the one number that describes how, during the past 24 hours,fatigue has interfered with your: A.General Activity | During the past 24 hours | NRS_0-10 | Interference | Hepatobiliary cancer |
| BFI | 138 | Circle the one number that describes how, during the past 24 hours,fatigue has interfered with your:B.Mood | During the past 24 hours | NRS_0-10 | Interference | Hepatobiliary cancer |
| BFI | 139 | Circle the one number that describes how, during the past 24 hours,fatigue has interfered with your: C.Walking ability | During the past 24 hours | NRS_0-10 | Interference | Hepatobiliary cancer |
| BFI | 140 | Circle the one number that describes how, during the past 24 hours,fatigue has interfered with your: D.Normal work (includes both work outside the home and daily chores) | During the past 24 hours | NRS_0-10 | Interference | Hepatobiliary cancer |
| BFI | 141 | Circle the one number that describes how, during the past 24 hours,fatigue has interfered with your:E.Relations with other people | During the past 24 hours | NRS_0-10 | Interference | Hepatobiliary cancer |
| BFI | 142 | Circle the one number that describes how, during the past 24 hours,fatigue has interfered with your:F. Enjoyment of life | During the past 24 hours | NRS_0-10 | Interference | Hepatobiliary cancer |
| MDASI | 143 | Your fatigue (tirdness) at its worst? | In the last 24 hours | NRS_0-10 | Intensity | Hepatobiliary cancer，Pancreatic cancer |
| ESAS-r | 144 | Tiredness(tiredness = lack of energy) | Now | NRS_0-10 | Intensity | Hepatobiliary cancer，Pancreatic cancer, Biliary tract cancer |
| EORTC QLQ-BIL21 | 145 | Have you felt lacking in energy? | During the past week | VRS_1-4 | Intensity | Cholangiocarcinoma or gallbladder cancer |
| EORTC QLQ-LMC21 | 146 | Have you felt lacking in energy? | During the past week | VRS_1-4 | Intensity | Liver metastasis from colorectal cancer |
| FACT-G | 147 | I have a lack of energy | Past 7 days | VRS_0-4 | Intensity | Hepatobiliary cancer |
| FACT-Hep | 148 | I have a lack of energy | Past 7 days | VRS_0-4 | Intensity | Hepatobiliary cancer (primary or metastatic)，Pancreatic cancer (primary or metastatic), Cholangiocarcinoma or gallbladder cancer |
| FHSI-18 | 149 | I have a lack of energy | Past 7 days | VRS_0-4 | Intensity | Pancreatic cancer |
| FHSI-8 | 150 | I have a lack of energy | Past 7 days | VRS_0-4 | Intensity | Hepatobiliary cancer，Pancreatic cancer, Cholangiocarcinoma or gallbladder cancer |
| WHOQOL-BREF | 151 | Do you have enough energy for everyday life? | Last two weeks | VRS_1-5 | Intensity | Hepatobiliary cancer |
| MSAS | 152 | How OFTEN did you have it? Lack of energy | During this past week | VRS_1-4 | Frequency | Hepatobiliary cancer，Pancreatic cancer |
| MSAS | 153 | How SEVERE was it usually? Lack of energy | During this past week | VRS_1-4 | Intensity | Hepatobiliary cancer，Pancreatic cancer |
| MSAS | 154 | How much did it DISTRESS or BOTHER you? Lack of energy | During this past week | VRS_0-4 | Interference | Hepatobiliary cancer，Pancreatic cancer |
| 21 | **Drowsiness** | MDASI | 155 | Your feeling of drowsy (sleepy) at its worst? | In the last 24 hours | NRS_0-10 | Intensity | Hepatobiliary cancer，Pancreatic cancer |
| ESAS-r | 156 | Drowsiness(drowsiness = feeling sleepy) | Now | NRS_0-10 | Intensity | Hepatobiliary cancer，Pancreatic cancer, Biliary tract cancer |
| MSAS | 157 | How OFTEN did you have it? feeling drowsy | During this past week | VRS_1-4 | Frequency | Hepatobiliary cancer，Pancreatic cancer |
| MSAS | 158 | How SEVERE was it usually? feeling drowsy | During this past week | VRS_1-4 | Intensity | Hepatobiliary cancer，Pancreatic cancer |
| MSAS | 159 | How much did it DISTRESS or BOTHER you? feeling drowsy | During this past week | VRS_0-4 | Interference | Hepatobiliary cancer，Pancreatic cancer |
| 22 | **Feel ill** | FACT-G | 160 | I feel ill | Past 7 days | VRS_0-4 | Intensity | Hepatobiliary cancer |
| FACT-Hep | 161 | I feel ill | Past 7 days | VRS_0-4 | Intensity | Hepatobiliary cancer (primary or metastatic)，Pancreatic cancer (primary or metastatic), Cholangiocarcinoma or gallbladder cancer |
| FHSI-18 | 162 | I feel ill | Past 7 days | VRS_0-4 | Intensity | Pancreatic cancer |
| 23 | **Sleep disturbance** | EORTC QLQ-C30 | 163 | Have you had trouble sleeping? | During the past week | VRS_1-4 | Intensity | Hepatobiliary cancer，Pancreatic cancer, Cholangiocarcinoma or gallbladder cancer, Liver metastasis from colorectal cancer |
| FACT-G | 164 | I am sleeping well | Past 7 days | VRS_0-4 | Interference | Hepatobiliary cancer |
| FACT-Hep | 165 | I am sleeping well | Past 7 days | VRS_0-4 | Interference | Hepatobiliary cancer (primary or metastatic)，Pancreatic cancer (primary or metastatic), Cholangiocarcinoma or gallbladder cancer |
| FHSI-18 | 166 | I am sleeping well | Past 7 days | VRS_0-4 | Interference | Pancreatic cancer |
| WHOQOL-BREF | 167 | How satisfied are you with your sleep? | Last two weeks | VRS_1-5 | Interference | Hepatobiliary cancer |
| MDASI | 168 | Your disturbed sleep at its worst? | In the last 24 hours | NRS_0-10 | Intensity | Hepatobiliary cancer，Pancreatic cancer |
| MSAS | 169 | How OFTEN did you have it? Difficulty sleeping | During this past week | VRS_1-4 | Frequency | Hepatobiliary cancer，Pancreatic cancer |
| MSAS | 170 | How SEVERE was it usually? Difficulty sleeping | During this past week | VRS_1-4 | Intensity | Hepatobiliary cancer，Pancreatic cancer |
| MSAS | 171 | How much did it DISTRESS or BOTHER you? Difficulty sleeping | During this past week | VRS_0-4 | Interference | Hepatobiliary cancer，Pancreatic cancer |
| 24 | **Sexual interest** | EORTC QLQ-HCC18 | 172 | During the past four weeks:Has the disease or treatment had any effect on your sex life? | During the past four weeks | VRS_1-4 | Interference | Hepatobiliary cancer |
| EORTC QLQ-LMC21 | 173 | During the past four weeks:Has the disease or treatment affected your sex life (for the worse)? | During the past four weeks | VRS_1-4 | Interference | Liver metastasis from colorectal cancer |
| FACT-G | 174 | I am satisfied with my sex life | Past 7 days | VRS_0-4 | Interference | Hepatobiliary cancer |
| FACT-Hep | 175 | I am satisfied with my sex life | Past 7 days | VRS_0-4 | Interference | Hepatobiliary cancer (primary or metastatic)，Pancreatic cancer (primary or metastatic), Cholangiocarcinoma or gallbladder cancer |
| WHOQOL-BREF | 176 | How satisfied are you with your sex life? | Last two weeks | VRS_1-5 | Interference | Hepatobiliary cancer |
| MSAS | 177 | How OFTEN did you have it? Problems with sexual interest or activity | During this past week | VRS_1-4 | Frequency | Hepatobiliary cancer，Pancreatic cancer |
| MSAS | 178 | How SEVERE was it usually? Problems with sexual interest or activity | During this past week | VRS_1-4 | Intensity | Hepatobiliary cancer，Pancreatic cancer |
| MSAS | 179 | How much did it DISTRESS or BOTHER you? Problems with sexual interest or activity | During this past week | VRS_0-4 | Interference | Hepatobiliary cancer，Pancreatic cancer |
| 25 | **Trouble with eating** | EORTC QLQ-LMC21 | 180 | Have you had trouble with eating? | During the past week | VRS_1-4 | Intensity | Liver metastasis from colorectal cancer |
| EORTC QLQ-BIL21 | 181 | Have you had trouble with eating? | During the past week | VRS_1-4 | Intensity | Cholangiocarcinoma or gallbladder cancer |
| 26 | **Sore mouth** | EORTC QLQ-LMC21 | 182 | Have you had a sore mouth or tongue? | During the past week | VRS_1-4 | Intensity | Liver metastasis from colorectal cancer |
| MSAS | 183 | How SEVERE was it usually? Mouth sores | During this past week | VRS_1-4 | Intensity | Hepatobiliary cancer，Pancreatic cancer |
| MSAS | 184 | How much did it DISTRESS or BOTHER you? Mouth sores | During this past week | VRS_0-4 | Interference | Hepatobiliary cancer，Pancreatic cancer |
| 27 | **Numbness or tingling** | EORTC QLQ-LMC21 | 185 | Have you had tingling hands or feet? | During the past week | VRS_1-4 | Intensity | Liver metastasis from colorectal cancer |
| MDASI | 186 | Your numbness or tingling at its worst? | In the last 24 hours | NRS_0-10 | Intensity | Hepatobiliary cancer，Pancreatic cancer |
| MSAS | 187 | How OFTEN did you have it? Numbness/tingling in hands/feet | During this past week | VRS_1-4 | Frequency | Hepatobiliary cancer，Pancreatic cancer |
| MSAS | 188 | How SEVERE was it usually? Numbness/tingling in hands/feet | During this past week | VRS_1-4 | Intensity | Hepatobiliary cancer，Pancreatic cancer |
| MSAS | 189 | How much did it DISTRESS or BOTHER you? Numbness/tingling in hands/feet | During this past week | VRS_0-4 | Interference | Hepatobiliary cancer，Pancreatic cancer |
| 28 | **Difficulty concentrating** | EORTC QLQ-C30 | 190 | Have you had difficulty in concentrating on things, like reading a newspaper or watching television? | During the past week | VRS_1-4 | Intensity | Hepatobiliary cancer，Pancreatic cancer, Cholangiocarcinoma or gallbladder cancer, Liver metastasis from colorectal cancer |
| WHOQOL-BREF | 191 | How well are you able to concentrate? | Last two weeks | VRS_1-5 | Intensity | Hepatobiliary cancer |
| MSAS | 192 | How OFTEN did you have it? Difficulty concentrating | During this past week | VRS_1-4 | Frequency | Hepatobiliary cancer，Pancreatic cancer |
| MSAS | 193 | How SEVERE was it usually? Difficulty concentrating | During this past week | VRS_1-4 | Intensity | Hepatobiliary cancer，Pancreatic cancer |
| MSAS | 194 | How much did it DISTRESS or BOTHER you? Difficulty concentrating | During this past week | VRS_0-4 | Interference | Hepatobiliary cancer，Pancreatic cancer |
| 29 | **Shortness of breath** | EORTC QLQ-C30 | 195 | Were you short of breath? | During the past week | VRS_1-4 | Intensity | Hepatobiliary cancer，Pancreatic cancer, Cholangiocarcinoma or gallbladder cancer, Liver metastasis from colorectal cancer |
| MDASI | 196 | Your shortness of breath at its worst? | In the last 24 hours | NRS_0-10 | Intensity | Hepatobiliary cancer，Pancreatic cancer |
| ESAS-r | 197 | Shortness of breath | Now | NRS_0-10 | Intensity | Hepatobiliary cancer，Pancreatic cancer, Biliary tract cancer |
| MSAS | 198 | How OFTEN did you have it? Shortness of breath | During this past week | VRS_1-4 | Frequency | Hepatobiliary cancer，Pancreatic cancer |
| MSAS | 199 | How SEVERE was it usually? Shortness of breath | During this past week | VRS_1-4 | Intensity | Hepatobiliary cancer，Pancreatic cancer |
| MSAS | 200 | How much did it DISTRESS or BOTHER you? Shortness of breath | During this past week | VRS_0-4 | Interference | Hepatobiliary cancer，Pancreatic cancer |
| 30 | **Cough** | MSAS | 201 | How OFTEN did you have it? Cough | During this past week | VRS_1-4 | Frequency | Hepatobiliary cancer，Pancreatic cancer |
| MSAS | 202 | How SEVERE was it usually? Cough | During this past week | VRS_1-4 | Intensity | Hepatobiliary cancer，Pancreatic cancer |
| MSAS | 203 | How much did it DISTRESS or BOTHER you? Cough | During this past week | VRS_0-4 | Interference | Hepatobiliary cancer，Pancreatic cancer |
| 31 | **Problems with urination** | MSAS | 204 | How OFTEN did you have it? Problems with urination | During this past week | VRS_1-4 | Frequency | Hepatobiliary cancer，Pancreatic cancer |
| MSAS | 205 | How SEVERE was it usually? Problems with urination | During this past week | VRS_1-4 | Intensity | Hepatobiliary cancer，Pancreatic cancer |
| MSAS | 206 | How much did it DISTRESS or BOTHER you? Problems with urination | During this past week | VRS_0-4 | Interference | Hepatobiliary cancer，Pancreatic cancer |
| 32 | **Sweats** | MSAS | 207 | How OFTEN did you have it? Sweats | During this past week | VRS_1-4 | Frequency | Hepatobiliary cancer，Pancreatic cancer |
| MSAS | 208 | How SEVERE was it usually? Sweats | During this past week | VRS_1-4 | Intensity | Hepatobiliary cancer，Pancreatic cancer |
| MSAS | 209 | How much did it DISTRESS or BOTHER you? Sweats | During this past week | VRS_0-4 | Interference | Hepatobiliary cancer，Pancreatic cancer |
| 33 | **Dizziness** | MSAS | 210 | How OFTEN did you have it? Dizziness | During this past week | VRS_1-4 | Frequency | Hepatobiliary cancer，Pancreatic cancer |
| MSAS | 211 | How SEVERE was it usually? Dizziness | During this past week | VRS_1-4 | Intensity | Hepatobiliary cancer，Pancreatic cancer |
| MSAS | 212 | How much did it DISTRESS or BOTHER you? Dizziness | During this past week | VRS_0-4 | Interference | Hepatobiliary cancer，Pancreatic cancer |
| 34 | **Difficulty swallowing** | MSAS | 213 | How OFTEN did you have it? Difficulty swallowing | During this past week | VRS_1-4 | Frequency | Hepatobiliary cancer，Pancreatic cancer |
| MSAS | 214 | How SEVERE was it usually? Difficulty swallowing | During this past week | VRS_1-4 | Intensity | Hepatobiliary cancer，Pancreatic cancer |
| MSAS | 215 | How much did it DISTRESS or BOTHER you? Difficulty swallowing | During this past week | VRS_0-4 | Interference | Hepatobiliary cancer，Pancreatic cancer |
| 35 | **Hair loss** | MSAS | 216 | How SEVERE was it usually? Hair loss | During this past week | VRS_1-4 | Intensity | Hepatobiliary cancer，Pancreatic cancer |
| MSAS | 217 | How much did it DISTRESS or BOTHER you? Hair loss | During this past week | VRS_0-4 | Interference | Hepatobiliary cancer，Pancreatic cancer |
| 36 | **Swelling of arms or legs** | MSAS | 218 | How SEVERE was it usually? Swelling of arms or legs | During this past week | VRS_1-4 | Intensity | Hepatobiliary cancer，Pancreatic cancer |
| MSAS | 219 | How much did it DISTRESS or BOTHER you? Swelling of arms or legs | During this past week | VRS_0-4 | Interference | Hepatobiliary cancer，Pancreatic cancer |
| 37 | **Digest function** | FACT-Hep | 220 | I have control of my bowels | Past 7 days | VRS_0-4 | Intensity | Hepatobiliary cancer (primary or metastatic)，Pancreatic cancer (primary or metastatic), Cholangiocarcinoma or gallbladder cancer |
| FACT-Hep | 221 | I can digest my food well | Past 7 days | VRS_0-4 | Intensity | Hepatobiliary cancer (primary or metastatic)，Pancreatic cancer (primary or metastatic), Cholangiocarcinoma or gallbladder cancer |
| 38 | **Difficulty remembering** | EORTC QLQ-C30 | 222 | Have you had difficulty remembering things? | During the past week | VRS_1-4 | Intensity | Hepatobiliary cancer，Pancreatic cancer, Cholangiocarcinoma or gallbladder cancer, Liver metastasis from colorectal cancer |
| MDASI | 223 | Your problem with remembering things at its worst? | In the last 24 hours | NRS_0-10 | Intensity | Hepatobiliary cancer，Pancreatic cancer |
| 39 | **Body image** | EORTC QLQ-HCC18 | 224 | Have you been concerned by the appearance of your abdomen? | During the past week | VRS_1-4 | Interference | Hepatobiliary cancer |
| EORTC QLQ-HCC18 | 225 | Have you lost muscle from your arms or legs? | During the past week | VRS_1-4 | Interference | Hepatobiliary cancer |
| FACT-Hep | 226 | I am unhappy about a change in my appearance | Past 7 days | VRS_0-4 | Interference | Hepatobiliary cancer (primary or metastatic)，Pancreatic cancer (primary or metastatic), Cholangiocarcinoma or gallbladder cancer |
| WHOQOL-BREF | 227 | Are you able to accept your bodily appearance? | Last two weeks | VRS_1-5 | Interference | Hepatobiliary cancer |
| 40 | **Changes in skin** | MSAS | 228 | How SEVERE was it usually? Changes in skin | During this past week | VRS_1-4 | Intensity | Hepatobiliary cancer，Pancreatic cancer |
| MSAS | 229 | How much did it DISTRESS or BOTHER you? Changes in skin | During this past week | VRS_0-4 | Interference | Hepatobiliary cancer，Pancreatic cancer |

**Appendix 4. Measurement properties of the symptom items that were included.**

| N**O.** | **Symptom** | **Items** | **Recall period** | | | | | | | **Response scale** | | | | | | **Assessment dimensions** | | | | **Instrument** | |
| --- | --- | --- | --- | --- | --- | --- | --- | --- | --- | --- | --- | --- | --- | --- | --- | --- | --- | --- | --- | --- | --- |
| **Now** | **Today** | **In the last 24 hours** | **During the past week** | **Past 7 days** | **Last two weeks** | **During the past four weeks** | **VRS_1-3** | **VRS_1-4** | **VRS_0-4** | **VRS_1-5** | **NRS_0-10** | **Binary** | **Frequency** | **Intensity** | **Interference** | **Relief** | **Generic** | **Disease-Specific** |
| 1 | Fatigue | 34 | 2 |  | 9 | 15 | 7 | 1 |  |  | 13 | 8 | 1 | 11 | 1 | 1 | 25 | 7 |  | 20 | 14 |
| 2 | Pain | 28 | 2 | 3 | 12 | 6 | 4 | 1 |  | 1 | 5 | 5 | 2 | 14 | 1 | 1 | 15 | 10 | 1 | 24 | 4 |
| 3 | Nausea | 10 | 1 |  | 1 | 4 | 4 |  |  |  | 3 | 5 |  | 2 |  | 1 | 8 | 1 |  | 7 | 3 |
| 4 | Sleep disturbance | 9 |  |  | 1 | 4 | 3 | 1 |  |  | 3 | 4 | 1 | 1 |  | 1 | 3 | 5 |  | 7 | 2 |
| 5 | Lack of appetite | 8 | 1 |  | 1 | 4 | 2 |  |  |  | 3 | 3 |  | 2 |  | 1 | 6 | 1 |  | 6 | 2 |
| 6 | Weight loss | 8 |  |  |  | 5 | 3 |  |  |  | 4 | 4 |  |  |  |  | 4 | 4 |  | 2 | 6 |
| 7 | Sexual interest | 8 |  |  |  | 3 | 2 | 1 | 2 |  | 4 | 3 | 1 |  |  | 1 | 1 | 6 |  | 5 | 3 |
| 8 | Discomfort or pain in stomach | 7 |  |  |  | 3 | 4 |  |  |  | 3 | 4 |  |  |  |  | 7 |  |  |  | 7 |
| 9 | Dry mouth | 7 |  |  | 1 | 5 | 1 |  |  |  | 4 | 2 |  | 1 |  | 1 | 5 | 1 |  | 4 | 3 |
| 10 | Jaundice | 7 |  |  |  | 4 | 3 |  |  |  | 4 | 3 |  |  |  |  | 2 | 5 |  |  | 7 |
| 11 | Taste changes | 6 |  |  |  | 5 | 1 |  |  |  | 4 | 2 |  |  |  |  | 5 | 1 |  | 2 | 4 |
| 12 | Itching | 6 |  |  |  | 5 | 1 |  |  |  | 4 | 2 |  |  |  | 1 | 4 | 1 |  | 3 | 3 |
| 13 | Shortness of breath | 6 | 1 |  | 1 | 4 |  |  |  |  | 3 | 1 |  | 2 |  | 1 | 4 | 1 |  | 6 |  |
| 14 | Back pain | 5 |  |  |  | 2 | 3 |  |  |  | 2 | 3 |  |  |  |  | 5 |  |  |  | 5 |
| 15 | Vomiting | 5 |  |  | 1 | 4 |  |  |  |  | 3 | 1 |  | 1 |  | 1 | 3 | 1 |  | 5 |  |
| 16 | Diarrhea | 5 |  |  |  | 4 | 1 |  |  |  | 3 | 2 |  |  |  | 1 | 3 | 1 |  | 4 | 1 |
| 17 | Bloating | 5 |  |  |  | 5 |  |  |  |  | 4 | 1 |  |  |  | 1 | 3 | 1 |  | 3 | 2 |
| 18 | Drowsiness | 5 | 1 |  | 1 | 3 |  |  |  |  | 2 | 1 |  | 2 |  | 1 | 3 | 1 |  | 5 |  |
| 19 | Numbness or tingling | 5 |  |  | 1 | 4 |  |  |  |  | 3 | 1 |  | 1 |  | 1 | 3 | 1 |  | 4 | 1 |
| 20 | Difficulty concentrating | 5 |  |  |  | 4 |  | 1 |  |  | 3 | 1 | 1 |  |  | 1 | 3 | 1 |  | 5 |  |
| 21 | Constipation | 4 |  |  |  | 3 | 1 |  |  |  | 2 | 2 |  |  |  |  | 3 | 1 |  | 3 | 1 |
| 22 | Body image | 4 |  |  |  | 2 | 1 | 1 |  |  | 2 | 1 | 1 |  |  |  | 0 | 4 |  | 1 | 3 |
| 23 | Early satiety | 3 |  |  |  | 3 |  |  |  |  | 3 |  |  |  |  |  | 3 |  |  |  | 3 |
| 24 | Feel ill | 3 |  |  |  |  | 3 |  |  |  |  | 3 |  |  |  |  | 3 |  |  | 1 | 2 |
| 25 | Sore mouth | 3 |  |  |  | 3 |  |  |  |  | 2 | 1 |  |  |  |  | 2 | 1 |  | 2 | 1 |
| 26 | Cough | 3 |  |  |  | 3 |  |  |  |  | 2 | 1 |  |  |  | 1 | 1 | 1 |  | 3 |  |
| 27 | Problems with urination | 3 |  |  |  | 3 |  |  |  |  | 2 | 1 |  |  |  | 1 | 1 | 1 |  | 3 |  |
| 28 | Sweats | 3 |  |  |  | 3 |  |  |  |  | 2 | 1 |  |  |  | 1 | 1 | 1 |  | 3 |  |
| 29 | Dizziness | 3 |  |  |  | 3 |  |  |  |  | 2 | 1 |  |  |  | 1 | 1 | 1 |  | 3 |  |
| 30 | Difficulty swallowing | 3 |  |  |  | 3 |  |  |  |  | 2 | 1 |  |  |  | 1 | 1 | 1 |  | 3 |  |
| 31 | Fever | 2 |  |  |  | 1 | 1 |  |  |  | 1 | 1 |  |  |  |  | 2 |  |  |  | 2 |
| 32 | Chill | 2 |  |  |  | 1 | 1 |  |  |  | 1 | 1 |  |  |  |  | 2 |  |  |  | 2 |
| 33 | Trouble with eating | 2 |  |  |  | 2 |  |  |  |  | 2 |  |  |  |  |  | 2 |  |  |  | 2 |
| 34 | Hair loss | 2 |  |  |  | 2 |  |  |  |  | 1 | 1 |  |  |  |  | 1 | 1 |  | 2 |  |
| 35 | Swelling of arms or legs | 2 |  |  |  | 2 |  |  |  |  | 1 | 1 |  |  |  |  | 1 | 1 |  | 2 |  |
| 36 | Digest function | 2 |  |  |  |  | 2 |  |  |  |  | 2 |  |  |  |  | 2 |  |  |  | 2 |
| 37 | Difficulty remembering | 2 |  |  | 1 | 1 |  |  |  |  | 1 |  |  | 1 |  |  | 2 |  |  | 2 |  |
| 38 | Skin change | 2 |  |  |  | 2 |  |  |  |  | 1 | 1 |  |  |  |  | 1 | 1 |  | 2 |  |
| 39 | Shoulder pain | 1 |  |  |  | 1 |  |  |  |  | 1 |  |  |  |  |  | 1 |  |  |  | 1 |
| 40 | Abdominal pain | 1 |  |  |  | 1 |  |  |  |  | 1 |  |  |  |  |  | 1 |  |  |  | 1 |
| **Total** | | **229** | **8** | **3** | **30** | **132** | **48** | **6** | **2** | **1** | **106** | **75** | **7** | **38** | **2** | **20** | **143** | **63** | **1** | **142** | **87** |
